1        **Novel R-type Lectin Domain-Containing Cytotoxins Comprise a Family of Virulence-**  
2                            **Modifying Proteins in Pathogenic *Leptospira***

3

4        **Reetika Chaurasia,<sup>1</sup> Alan Marroquin,<sup>1</sup> Michael A. Matthias,<sup>1\*</sup> and Joseph M. Vinetz<sup>1\*</sup>**

5

6        <sup>1</sup>Section of Infectious Diseases, Department of Internal Medicine, Yale University School of  
7        Medicine, New Haven, Connecticut 06520-8022, USA

8

9        \*Correspondence to M.A.M ([michael.matthias@yale.edu](mailto:michael.matthias@yale.edu)) or J.M.V. ([joseph.vinetz@yale.edu](mailto:joseph.vinetz@yale.edu))

10

11

12

13

14

15

16

17

18

19 **Abstract**

20 Leptospirosis is a globally important neglected zoonotic disease subject to both small scale  
21 outbreaks and weather-driven, large-scale epidemics. Due to gaps in our understanding of  
22 *Leptospira* biology, pathogenetic mechanisms of leptospirosis remain largely unknown. Previous  
23 data suggest that a gene family, PF07598, unique amongst most known bacterial pathogens and  
24 encoding so-called “Virulence-Modifying (VM)” proteins, are important virulence determinants.  
25 Here, we show that VM proteins are potent cytotoxins, sharing a distinct domain organization  
26 while exhibiting varied mechanisms of cellular toxicity. Structural homology searches using  
27 Phyre2 suggest that VM proteins are novel R-type lectins containing an N-terminal ricin B chain-  
28 like domain. As is known for native ricin B-chain, recombinant full-length **rLA3490** (most highly  
29 up-regulated *in vivo*) and an N-terminal fragment, **t3490**, containing a partial ricin B-domain,  
30 bound to asialofetuin and directly competed for asialofetuin binding with recombinant ricin B  
31 chain. While **t3490** bound to the HeLa cell surface but was neither internalized nor cytotoxic,  
32 **rLA3490** bound to the HeLa cell surface, was rapidly internalized, translocated to the nucleus  
33 inducing chromosomal fragmentation, and was rapidly cytolethal, providing strong evidence that  
34 *Leptospira* VM proteins are *bona fide* cytotoxins. Because monoclonal antibodies impeding cell  
35 entry or intracellular trafficking of ricin holotoxin clearly mitigate its toxicity, that VM proteins  
36 share binding and intracellular trafficking mechanisms suggests that anti-VM-protein antibody-  
37 based (anti-toxin) therapeutics could ameliorate severe complications of leptospirosis thereby  
38 improving prognosis. As most VM proteins are restricted to high-virulence *Leptospira* species  
39 with some, e.g., LA3490, being exceptionally potent, their level in serum might be a potentially  
40 useful indicator of a poor prognosis, thus identifying high risk patients.

41 **Author Summary**

42  
43 The PF07598 gene family encoding Virulence-Modifying (VM) proteins in pathogenic *Leptospira*  
44 species is associated with severe manifestations of leptospirosis. Structural homology searches  
45 indicate that VM proteins contain an N-terminal ricin B chain-like domain, biochemically  
46 confirmed in asialofetuin binding and competitive-binding assays suggesting that VM proteins  
47 bind to terminal galactosyl residues of this model ricin B domain binding protein. The leptospiral  
48 N-terminal ricin B chain-like domain mediated VM protein binding to HeLa cells. Full-length  
49 recombinant protein rapidly led to cell death. Amino acid conservation among PF07598 family  
50 members at the N-terminal ricin B chain-like domain suggests that VM protein levels in serum  
51 might be a useful biomarker for quickly identifying at-risk patients, and that novel “anti-toxin”-  
52 based therapeutics could ameliorate severe complications of leptospirosis, both of which remain  
53 to be explored.

54

55 **Keywords:** cytotoxin, ricin B-like, lectin, genotoxin, cytopathic effect

56

## 57 **Introduction**

58 Leptospirosis is a globally important neglected zoonotic disease subject to both small scale  
59 outbreaks and weather-driven, large-scale epidemics, with substantial impact on veterinary and  
60 public health. Conservative estimates suggest that the global burden of human disease due to  
61 leptospirosis is on par with cholera and typhoid fever (1-3). Annually, more than 1 million cases  
62 and 58,900 deaths are estimated to occur globally with case fatality rates ranging from 5-20% (1,  
63 4). Humans become infected after exposure to freshwater or wet soils contaminated by the urine  
64 of mammalian reservoir hosts. Clinical presentation varies from an undifferentiated fever to  
65 jaundice, renal failure, pulmonary hemorrhage, shock and fulminant death (5-10). Despite  
66 informative *in vitro* and small animal models, the molecular, cellular and immunological  
67 mechanisms of disease pathogenesis remain unclear (6, 11).

68       Previously published genomic, pathogenomic and gene expression data suggest that the  
69 PF07598 gene family, encoding the so-called Virulence Modifying (VM) proteins, may contribute  
70 to the pathogenesis of leptospirosis. VM proteins contain secretory signal peptides (12), and the  
71 expression of various PF07598 gene family members is upregulated, both *in vitro*, under  
72 conditions mimicking the *in vivo* host environment (13), and *in vivo* in small animal models of  
73 acute infection (14). That VM proteins are restricted to group I pathogenic *Leptospira* and  
74 expanded in the most highly pathogenic *Leptospira* species and serovars (12, 14), including the  
75 cosmopolitan and lethal serovars Copenhageni and Canicola, further suggests that they are  
76 involved in pathogenesis.

77       Based on structural homology searches using Phyre2 (15) that identified, with high  
78 confidence, an N-terminal R-type lectin (ricin B-like) domain in the PF07598 gene family, we  
79 hypothesized that VM proteins, like ricin, are cytotoxins. First, we tested whether the putative ricin

80 B-like domain in both recombinant full-length, and a truncated protein containing a (partial) ricin  
81 B domain of LA3490, the most highly up-regulated PF07598 gene in vivo (14), like ricin B chain,  
82 bound to immobilized asialofetuin, a terminal galactosyl-containing glycoprotein, in vitro (16, 17).  
83 Next, we determined whether recombinant full-length and truncated recombinant protein LA3490  
84 produced cytopathic effects on cultured HeLa cells. A detailed comparative cross-serovar and  
85 cross-species computational analysis was done to assess potential therapeutic potential of anti-VM  
86 protein antibodies and biological plausibility of conserved VM protein ricin B domains as vaccine  
87 candidates.

88

## 89 **Results**

90 ***Domain architecture analysis of VM proteins.*** Previous work identified a group I pathogen-  
91 specific family of paralogous *Leptospira* proteins uninformatively classified as PF07598  
92 (DUF1561) that are expanded ( $\geq 12$  copies/genome) in highly pathogenic members of the genus,  
93 e.g., *L. interrogans* serovar Lai, some of which including serovars Copenhageni and Canicola are  
94 cosmopolitan and of particular public health importance. The PF07598 gene family members were  
95 not associated with discernable pathogenicity islands, IS elements, nor virulence gene-related  
96 operons (12). Previous studies demonstrated that select paralogs were highly upregulated in vivo  
97 (14, 18) during mammalian infection and that some were necessary for virulence (14, 19, 20).  
98 Serovar Lai encodes 12 paralogs, whereas serovars Copenhageni and Manilae each contain 13  
99 paralogs (Table 1, gene IDs/locus tags and corresponding Uniprot IDs of all PF07598 paralogs  
100 found in serovars Lai, Copenhageni and Manilae; those for which knockout mutants are available  
101 and have been implicated in virulence are indicated). Both LA3490 ([Q8F0K3](#)) and LA0620  
102 ([Q8F8D7](#)) are present and highly conserved among all three serovars, with average amino acid

103 identities exceeding 99% (Table 2, and S1 Appendix 1 – 3). Serovars Copenhageni and Manilae,  
104 contain an additional ortholog, LIC\_10639 ([Q72UL8](#)) and LMANV2\_170032 ([A0A2H1XAY7](#)),  
105 respectively, sharing 94% amino acid identity that is absent from serovar Lai.

106         Apart from group I pathogenic *Leptospira*, PF07598 orthologs are found in a number of  
107 facultative intracellular bacterial genera including a large family in *Bartonella* (21, 22), and single  
108 copies in Campylobacterales (*Campylobacter* spp., *Helicobacter* spp.), *Piscirickettsiaceae*,  
109 Actinoplanes and some Vibrionaceae (12). Unlike highly pathogenic group I *Leptospira* (*L.*  
110 *interrogans*, *L. kirschneri* and *L. noguchii*) and *B. bacilliformis* and *B. australis* that contain 12 or  
111 more paralogs per genome, these other genomes encode only single copy homologs with only a  
112 few non-*Leptospira* genomes encoding multiple (as many as 4) additional paralogs. Multiple  
113 sequence alignment via MAFFT version 7 and protein-disordered structural analysis in Jalview  
114 v2.10.5 (S1 Fig) demonstrated that serovars Lai, Copenhageni, Manilae, Canicola, Hardjo and  
115 Pomona encode 10 – 12 long, multidomain paralogs (Fig 1A) with domain organization similar to  
116 but in reverse orientation of castor bean-produced ricin toxin (23), and distinct from most other  
117 bacteria-secreted exotoxins (24-28) that are usually encoded by two or more genes and assembled  
118 into multimeric protein complexes (26). All six serovars also contain a shortened PF07598 paralog  
119 containing a signal peptide but lacking the N-terminally located ricin B-like binding domain (Fig  
120 1A and below).

121  
122 ***Leptospiral ricin B-like domains have carbohydrate binding properties similar to that of ricin B***  
123 ***chain.*** Phyre2 searching (<http://www.sbg.bio.ic.ac.uk/phyre2>) (15) identified a ricin B-like  $\beta$ -  
124 trefoil domain in the amino-terminal region of leptospiral VM proteins leading us to hypothesize  
125 that, like ricin B, and other ricin B-domain containing bacterial toxins, e.g., *Vibrio cholerae*

126 cytolysin, VCC (29), VM proteins ought to bind to host cell-surface glycoconjugates. We focused  
127 here on [Q8F0K3](#) (LA3490) because our previous data indicated that it is implicated in virulence  
128 and is highly up-regulated in vivo (14). Recombinant [Q8F0K3](#) (rLA3490) was expressed in *E. coli*  
129 as an N-terminal fusion with thioredoxin and C-terminal fusion with mCherry and a His<sub>6</sub> tag to  
130 facilitate folding and affinity purification and visualization of the protein using fluorescence  
131 microscopy, respectively (Fig 1B). Because native ricin B binds to terminal galactosyl residues of  
132 glycoconjugates (30), we used asialofetuin, a terminal galactosyl-containing glycoprotein used for  
133 assaying the presence of ricin holotoxin (16, 17, 31), to determine whether rLA3490 would have  
134 similar carbohydrate binding specificity. Soluble recombinant proteins, both full-length and  
135 truncated, t3490 (i.e. partial ricin B domain, lacking the middle and C-terminal domains (putative  
136 translocation and enzymatic)) (Fig 1B), were purified by nickel affinity chromatography, verified  
137 by Western immunoblot, and determined to have low levels of endotoxin contamination using a  
138 Limulus Amebocyte Lysate (LAL) assay (Fig 2). Binding and ricin B competition assays  
139 confirmed that both rLA3490 and t3490 bound to asialofetuin, that binding was mediated by the  
140 N-terminal carbohydrate binding domains (CBDs) and that these shared ligand specificity with  
141 ricin B (Fig 3).

142

143 ***Full-length, rLA3490, but not t3490, causes cytopathic effects on HeLa cells.*** Some bacterial  
144 cytotoxins such as those of *Bordetella pertussis*, *Bacillus anthracis*, *Pseudomonas aeruginosa*,  
145 *Yersinia pestis*, *Vibrio cholerae* and *Salmonella typhi*, bind to cell surfaces, become internalized  
146 and then exert their effects on one or more intracellular targets (28, 29, 32). Having established  
147 that VM proteins contain *bona fide* N-terminal ricin B-like domains, we tested the hypothesis that  
148 full-length VM proteins were indeed cytotoxins. Cytopathic effect including cell rounding and

149 blebbing (Fig 4A, and S1 + S2 Video), release of lactate dehydrogenase (Fig 4B), and cell death  
150 (Fig 5A) and detachment (Fig 5B), occurred in HeLa cells treated with rLA3490. Such changes  
151 were not observed with t3490, bovine serum albumin (BSA) or in untreated HeLa cells. Upon  
152 exposure to rLA3490, HeLa cell adhesion was reduced significantly compared to controls (40%  
153 vs >80%) (Fig 5B).

154 To further corroborate these findings, live-cell experiments using a transposon mutant of  
155 serovar Manilae, M1439, containing a disrupted LA3490 ortholog (LMANV2\_1700091, Table 1),  
156 which had no cytopathic effect on HeLa cells, and an isogenic wildtype strain that had a  
157 pronounced effect (Fig 6). To induce expression of LMANV2\_1700091, *Leptospira* cells were  
158 grown in liquid EMJH in the presence of 120mM NaCl plus 10% rat serum, conditions previously  
159 shown to mimic the host environment (13, 33). Such conditioned *Leptospira* were used to infect  
160 HeLa cell monolayers at a Multiplicity Of Infection (MOI) of 100:1. Whereas wildtype *L.*  
161 *interrogans* serovar Manilae produced cytopathic effect within 2 h, neither M1439 nor the ‘mild’  
162 pathogen, *L. licerasiae* serovar Varillal, which lacks the PF07598 gene family entirely (12), had  
163 any noticeable cytopathic effect, even 4 h post-infection (Fig 6), confirming that LA3490 and its  
164 orthologs (e.g., LMANV2\_1700091) have potent cytotoxic activity.

165  
166 ***Full-length VM protein LA3490 is internalized by HeLa cells and is translocated to the nucleus.***

167 To test whether rLA3490 (and VM proteins in general) are internalized by HeLa cells, rLA3490-  
168 and t3490-mCherry fusion proteins were visualized by super-resolution confocal microscopy  
169 (Leica SP8 Gated STED 3X). Like t3490, rLA3490 bound to the cell surface, but the full length  
170 protein was internalized and translocated to the nucleus. Maximum binding occurred 30 – 60



171 minutes post-exposure, with internalization, translocation and nuclear degradation evident from  
172 30 min onwards; t3490 bound to the surface of HeLa cells but was not internalized (Fig 7).

173  
174 ***Full-length VM protein rLA3490 induces actin depolymerization in HeLa cells.*** Internalization  
175 of rLA3490 induced depolymerization of actin filaments producing cell rounding from 1 h  
176 onwards after treatment (Fig 8A). The morphology of HeLa cells treated with t3490 (Fig 8B) or  
177 BSA (Fig 8C), and untreated cells (Fig 8D) remained unaltered. The mechanism(s) by which  
178 leptospiral VM proteins, such as LA3490, perturb actin polymerization merits further  
179 investigation.

180  
181 ***Distribution of VM paralogs among medically important Leptospira serovars, as potential***  
182 ***prognostic biomarkers and implications for biotherapeutics.*** Based on publicly accessible  
183 sequence data, it is clear that VM proteins have an extremely limited taxonomic distribution.  
184 Among the organisms known to possess VM proteins, three species of *Leptospira* (*interrogans*,  
185 *kirschneri* and *noguchii*), which comprise the most highly pathogenic *Leptospira*, and two species  
186 of *Bartonella* (*bacilliformis* and *australis*) are exceptional in that their genomes contain 12 or more  
187 distinct VM paralogs, whereas most other species including other, less virulent, group I pathogenic  
188 *Leptospira* encode at most 5 paralogs. Previous comparative whole genome analysis of all (at the  
189 time) recognized pathogenic *Leptospira* species hinted at a complex series of gene  
190 duplications/deletions underpinning the uneven the distribution of VM proteins amongst  
191 *Leptospira*. To further explore this phenomenon with an eye towards biomarker discovery and the  
192 development of novel therapeutics, we performed a more focused analysis incorporating the  
193 improved understanding of VM protein domain organization (targeting vs enzymatic) uncovered

194 here. Manually curated multiple sequence alignments (S1 Fig) were used to produce detailed  
195 pairwise distance matrices of full-length proteins (S1 Appendix 1), and isolated lectin (S1  
196 Appendix 2) and toxin domains (S1 Appendix 3) from six public-health important *L. interrogans*  
197 serovars Lai (field mouse reservoir, and reference genome), Copenhageni (rat-borne), Canicola  
198 (dogs), Hardjo (cattle), Manilae (rat-borne) and Pomona (broad host range including pigs) that  
199 allow us to draw important conclusions. First, as might be expected, the N-terminally located  
200 ‘targeting’ lectin domains are on average more conserved (78% amino acid identity, amino acid  
201 identity) than the C-terminal toxin domains (63% amino acid identity), consistent with our belief  
202 that VM proteins are essentially lectin cytotoxins. Second, the range of targeting and toxin  
203 functionalities varies amongst serovars, with both serovar-related duplications of certain lectin  
204 domains and lectin domain-toxin domain combinations. For example, both the N- and C-terminal  
205 domains of LA3490 are present and highly conserved (98.7% and 98.6% amino acid identity,  
206 respectively) in all six serovars analyzed: Lai, Copenhageni, Canicola, Hardjo, Manilae and  
207 Pomona. Whereas the full-length Lai and Copenhageni VM proteins are highly conserved between  
208 each other in both lectin (99.6% amino acid identity) and toxin (99.7%) domains, in serovar  
209 Canicola, for example, the LA3490 toxin domain (97.6% amino acid identity) is linked to a  
210 different lectin domain shared with Q72UL8 (LIC\_RS03300) (97.8% amino acid identity), which  
211 itself occurs in tandem with a distinct toxin domain (61.6% amino acid identity). In some paralogs,  
212 e.g., Q72U83 and Q72NP1, the lectin domains are 100% conserved, but linked to distinct toxin  
213 domains (70.7% amino acid identity), suggesting that apart from amino acid sequence variation in  
214 either domain, domain shuffling to produce varied lectin and toxin domain combinations could  
215 also contribute to the diversity of *Leptospira* VM proteins.

216           Based on the dramatically differing response of rLA3490- and rLA0620-treated HeLa cell  
217 monolayers, the observed sequence variation in the toxin domains could impact potency and/or  
218 mechanisms of toxicity. It is also evident that some serovars, e.g., Lai and Hardjo, and Canicola  
219 and Pomona have nearly perfect (>99% amino acid identity) conservation of their full-complement  
220 of lectin domains and may have similar cellular targets.

221

## 222 **Discussion**

223           Here we demonstrate that *Leptospira* Virulence Modifying (VM) proteins (12, 14) are *bona*  
224 *fide* R-type lectin domain-containing cytotoxins, virtually unique to pathogenic *Leptospira*, some  
225 of which rapidly kill mammalian cells after first binding to the cell surface, internalization and  
226 nuclear translocation. VM proteins produce cytopathic effect including cell rounding, cell  
227 membrane blebbing, pedestal formation, actin depolymerization, nuclear fragmentation and  
228 ultimately cell lysis and death. Most contain an N-terminal fragment containing an empirically  
229 verified carbohydrate binding domain (CBD) sharing binding specificity with ricin B chain for  
230 terminal galactosyl residues of glycoconjugates that likely mediates cell binding/targeting and  
231 internalization, and a more variable C-terminal domain (CTD) responsible for intracellular  
232 trafficking and cytotoxicity. The high amino acid identity of the N-terminally located ricin B-like  
233 domain enables grouping of *L. interrogans* serovars into host cell tropic or virulence groups based  
234 on pairwise comparisons of the full complement of N-terminal CBDs or C-terminal CTDs,  
235 respectively, based on their respective VM paralogs. The finding that certain VM protein homologs  
236 induce cytopathic effect is the first definitive evidence that certain serovars are intrinsically more  
237 virulent than others and therefore of heightened clinical and public health significance.

238 Like ricin, for which toxicity and pathology are clearly linked and route dependent  
239 (inhalation leading to severe respiratory compromise being most lethal), site-specific expression of  
240 select VM family members could be a parsimonious explanation of the famously poorly understood  
241 ‘protean’ manifestations of severe leptospirosis. Indeed, efforts to understand the molecular and  
242 cellular pathogenesis of leptospirosis remains in its infancy, and approaches to prevent leptospirosis  
243 or ameliorate its pathogenesis are predicated on mechanistic understandings of the biology of  
244 *Leptospira*-host interactions. For example, pulmonary hemorrhage and refractory shock are  
245 particularly important clinical manifestation of leptospirosis (34-41). Indirect evidence—that these  
246 serious manifestations are ameliorated by hemodialysis/hemofiltration (42, 43)—suggests that  
247 there may be circulating soluble toxin(s) in leptospirosis. Histopathological analysis of lung tissues  
248 in severe pulmonary leptospirosis syndrome do not find intact *Leptospira* (44), but rather damage  
249 to alveolar epithelial and activation of endothelial cells, which might explain deposition of  
250 immunoglobulin and complement as secondary events (45-47). The data we present here build on  
251 our previously published observations (12-14) that showed *Leptospira* VM proteins to be major  
252 virulence factors, potentially involved in the molecular and cellular pathogenesis of leptospirosis.  
253 And crucially, new monoclonal antibody based ‘biotherapeutics’ targeting these seemingly potent  
254 *Leptospira* R-type cytotoxins could revolutionize patient care and could ameliorate severe  
255 manifestations of leptospirosis.

256 Extensive studies using transposon mutants indicate have shown that multiple distinct VM  
257 proteins, including LA0589, contribute to lethal disease in an experimental hamster model (20, 37).  
258 The present work is consistent with previous findings that LA3490 is among the most highly  
259 upregulated PF07598 family members *in vivo* (14). Phyre2-based *in silico* analysis indicated that  
260 VM proteins contain ricin B domains (R-type lectins), which was confirmed experimentally using

261 recombinant full-length VM protein (rLA3490) and N-terminal fragments containing isolated ricin  
262 B domains (t3490, t0620). R-type lectins belong to a superfamily of proteins containing a CBD  
263 named for and structurally similar to ricin B chain and are found in plants, animals, and bacteria  
264 (30). Ricin and its B chain (and other R-type lectins) bind to terminal galactoses or other related  
265 glycans of a diverse range of host cell surface glycoconjugates, which facilitates translocation and  
266 internalization of the ricin A chain into target cells, resulting in cell death via inhibition of protein  
267 synthesis (48-51). Likewise, most potent bacterial toxins such as Shiga, diphtheria and pertussis  
268 toxins mediate cell death either by ADP-ribosylation of 28S rRNA or by inactivation of elongation  
269 factor 2 (52-55). However, the less well-studied genotoxins, e.g., cytolethal distending toxins  
270 (CDTs), are endonucleases that exert their toxic activity following nuclear translocation, similar to  
271 LA3490.

272         While we demonstrated that ricin B domains of distinct VM proteins (LA3490 and  
273 LA0620) bound to immobilized asialofetuin (16, 56, 57), native target ligands and cellular targets  
274 are yet to be defined. Second, differences in cytopathic potential among VM proteins and molecular  
275 pathways by which these proteins exert their biological effects remain to be explored, though these  
276 initial experiments clearly indicate that toxicity is mediated by the CTD and is likely to differ  
277 among various VM family members because of substantial amino acid sequence variation in the  
278 C-terminal half of the molecule. Third, while sequence variation and domain shuffling account for  
279 the VM protein diversity, we do not yet understand the reasons for the expansion of PF07598  
280 paralogs in *L. interrogans*, *L. kirschneri* and *L. noguchii* (14) compared to other pathogenic  
281 *Leptospira* species (12, 14), the uneven distribution of VM paralogs, which are clearly non-  
282 redundant (12), among medically-important serovars would imply that necessary targeting and  
283 toxin functionality are serovar-dependent with host adaptation a potential eco-evolutionary driver.

## 284 **Materials and Methods**

285 **Bacterial strains.** *Leptospira* were maintained at 30°C in semi-solid **E**llinghausen, **M**ccullough,  
286 **J**ohnson and **H**arris medium (EMJH, BD Biosciences, USA) (58). Isogenic, wild type *L.*  
287 *interrogans* serovar Manilae strain L459 (National Veterinary Services Laboratory, Ames, IA,  
288 USA), mutant M1439 (transposon mutant LMANV2\_170091) (20) and *L. licerasiae* VAR010  
289 (isolated from mild leptospirosis case in Peru) were cultured in liquid EMJH medium to a cell  
290 density of  $\sim 2 \times 10^8$  cells/mL supplemented with 120 mM NaCl and 10% rat serum (Rockland  
291 Immunochemicals, USA) to simulate the in vivo host environment and to induce virulence gene  
292 expression (59). *Leptospira* cells were harvested by centrifugation at 18,514 g for 20 min at 4°C  
293 (Eppendorf, USA), washed twice with cold 1X PBS, pH 7.4 (AmericanBio, USA), and then  
294 counted by dark-field microscopy via a Petroff-Hausser counting chamber (Fisher Scientific,  
295 USA).

296  
297 **Mammalian cell culture.** HeLa cells were obtained from the **A**merican **T**ype **C**ulture **C**ollection  
298 (ATCC, USA) and maintained in **D**ulbecco's **M**odified **E**agle **M**edium (DMEM; Sigma-Aldrich,  
299 USA), supplemented with 10% fetal bovine serum and 1% antibiotic-antimycotic solution  
300 (penicillin, 100 units/mL; streptomycin, 100  $\mu$ g/mL and amphotericin, 25  $\mu$ g/mL; Invitrogen,  
301 USA) at 37°C in a humidified atmosphere containing 5% CO<sub>2</sub>. Antibiotic-containing medium was  
302 replaced with fresh, antibiotic-free medium prior to experimental infection with *Leptospira*, which  
303 were done at a MOI of 100:1 for 4 h (60).

304  
305 **In silico analysis.** To improve functional classification of PF07598, nucleotide sequences of  
306 LA3490 and LA0620 were uploaded to the online Phyre2 server

307 (<http://www.sbg.bio.ic.ac.uk/phyre2>) (15), which utilizes structural information to detect remote  
308 homologs. In addition, coding sequences of all full-length (excluding pseudogenes) PF07598 gene  
309 family members in *L. interrogans* serovars Lai strain 56601<sup>T</sup> [12 paralogs], Copenhageni L1-130  
310 [13], Canicola [13], Hardjo subtype prajitno Norma [12], Manilae strain L495 [13], Pomona [12],  
311 and *L. kirschneri* Pomona [10] were downloaded from Uniprot (<http://www.uniprot.com>) and  
312 aligned using the MAFFT v7 *ainsi* algorithm with default parameters  
313 (<http://mafft.cbrc.jp/alignment/software>). Poorly aligned regions were refined manually in Jalview  
314 v2.10.5, which was also used to predict secondary structure (JPred with default parameters  
315 (<http://www.compbio.dundee.ac.uk/jpred/jalviewWS/service/JPred>)), and to identify globular  
316 domains (GlobPlot with default parameters (<http://globplot.embl.de>)).

317  
318 ***Plasmid constructs and cloning.*** The gene sequences of LA3490 (Gene Bank Accession number;  
319 [NP\\_713670.1](https://www.ncbi.nlm.nih.gov/nuccore/NP_713670.1), 1920 bp) and LA0620 ([NP\\_710801.1](https://www.ncbi.nlm.nih.gov/nuccore/NP_710801.1), 1914 bp) were retrieved from NCBI  
320 (<https://www.ncbi.nlm.nih.gov>). Sequences of full-length LA3490 without signal peptide (57 bp –  
321 1920 bp) and N-terminal ricin domain of LA3490 (123 bp – 552 bp) were codon-optimized and  
322 fused with full-length mCherry ([AST15061.1](https://www.ncbi.nlm.nih.gov/nuccore/AST15061.1)) as a fluorescent tag (708 bp) along with a glycine-  
323 serine hinge (Gly4S) and flanking N- and C-terminally located enterokinase recognition sites (Fig  
324 1B). Synthetic genes were cloned into pET32b (+) (Gene Universal Inc., USA), and verified by  
325 sequencing.

326  
327 ***Recombinant protein expression and purification.*** Because PF07598 gene family members are  
328 cysteine-rich, recombinant proteins were expressed in SHuffle<sup>®</sup>T7 competent *E. coli* cells (New  
329 England Biolabs, USA), due to their capacity to promote disulfide bonds in the cytoplasm ensuring

330 proper protein folding. Transformants were sub-cultured into Luria-Bertani (LB) medium  
331 containing 100  $\mu\text{g}/\text{mL}$  ampicillin. When cultures had reached an OD of 0.6, expression was  
332 induced at 16°C and 250 rpm for 24 h via addition of 1 mM isopropylthio- $\beta$ -D-galactoside (IPTG;  
333 Sigma-Aldrich, USA). Following induction, cells were pelleted then lysed in CellLytic™ B (Cell  
334 Lysis Reagent; Sigma-Aldrich, USA) containing 50 units benzonase (Sigma-Aldrich, USA), 0.2  
335  $\mu\text{g}/\text{mL}$  lysozyme, non-EDTA protease inhibitor (Roche, USA) and 100 mM PMSF (Sigma-  
336 Aldrich, USA) for 1 h at 37°C. Lysates were then centrifuged at 4°C and 18,514 g for 10 min,  
337 supernatants and pellets were separated, and protein concentration determined by BCA (Pierce™  
338 BCA Protein Assay Kit, Thermo Scientific, USA). Proteins were analyzed by 4-12% bis-tris  
339 sodium dodecyl sulfate-polyacrylamide gel electrophoresis (SDS-PAGE). Purification was done  
340 using 5 mL pre-packed Ni-sepharose AKTA Hi-TRAP column (GE Healthcare, USA) equilibrated  
341 (100 mM  $\text{NaH}_2\text{PO}_4$ , 10 mM Tris-HCl, 25 mM imidazole, pH 8.0). Bound protein was eluted in  
342 buffer containing 500 mM imidazole, pH 8.0. Pooled eluates were concentrated using a 30 kDa  
343 amicon ultra-centrifugation tube (Merck Millipore, Germany) and washed two to three times with  
344 1X PBS pH 7.4 at 4°C. Purified soluble recombinant proteins were tested for bacterial endotoxins  
345 using the Limulus Amebocyte Lysate (LAL) assay kit (Invitrogen, USA).

346  
347 ***SDS-PAGE and Western immunoblot analysis.*** SDS-PAGE was performed according to the  
348 method of Laemmli (61). Proteins were stained with Coomassie Brilliant Blue R-250. For Western  
349 immunoblot analysis, proteins were transferred onto a nitrocellulose membrane. The membrane  
350 was blocked with 5% nonfat dry milk in 1X TBST (TBS + 1% Tween 20) buffer (AmericanBio,  
351 USA) for 2 h, and then probed with either mouse anti-His monoclonal antibody (1:2,000 dilution;  
352 Santa Cruz Biotechnology, USA) or mouse anti-LA3490 polyclonal antibodies and mouse anti-



353 LA0620 polyclonal antibodies (1:1,000 dilution), respectively. After washing with TBST, the blot  
354 was incubated for 2½ h with alkaline phosphatase-conjugated goat anti-mouse IgG (H+L) as the  
355 secondary antibody at dilution of 1:5000 dilution (KPL, USA). The blot was developed with ready-  
356 to-use 5-bromo-4-chloro-3-indolyl phosphate and nitroblue tetrazolium solution (BCIP/NBT;  
357 KPL, USA).

358  
359 ***Asialofetuin binding and ricin B chain competitive binding assay.*** Binding assays were done  
360 using Immulon<sup>®</sup> 2HB flat-bottom microtiter plates (Thermo Fisher Scientific, USA). Plates were  
361 coated with asialofetuin (250 ng/100 µL in carbonate-bicarbonate buffer, pH 9.4), incubated at  
362 4°C for overnight, and then blocked with 5% non-fat skimmed milk in 1X TBST for 2 h at 37°C.  
363 After blocking, rLA3490 and t3490 were added separately at a concentration of 50 nM (in 1X  
364 TBST). Plates were incubated for 2 h; and washed three times with TBST prior to incubation for  
365 1 h with anti-LA3490 polyclonal antibodies (1:1000 in TBST). Bound rLA3490/t3490 was  
366 quantified as follows: plates were incubated with goat anti-mouse IgG (1:5000; KPL, USA) for 1  
367 h, washed thrice with TBST and developed with p-Nitrophenyl phosphate (1-Step<sup>™</sup> PNPP  
368 Substrate Solution; KPL, USA). The reaction was stopped with 2 M NaOH, and absorbance was  
369 read at 405nm on a SpectraMax<sup>®</sup> M2e Microplate Reader with preinstalled SoftMax<sup>®</sup> Pro 5.2  
370 (Molecular Devices, USA).

371 For competitive binding assays, plates were pre-incubated with either 25 nM or 50 nM  
372 recombinant ricin B chain (Vector Laboratories, USA) for 2 h before addition of 50 nM of  
373 rLA3490 or t3490 and a final 2 h incubation. Bound rLA3490/t3490 was quantified as described  
374 in the preceding paragraph.

375

376 ***rLA3490-mediated HeLa cell cytotoxicity.*** HeLa cells (35,000 cells/200  $\mu$ L) were seeded in 8 well  
377 chamber slides (LabTek, USA) and incubated at 37°C in a humidified atmosphere containing 5%  
378 CO<sub>2</sub> for 24 h. Cells were treated with 5  $\mu$ g/mL of rLA3490 or t3490 for up to 4 h; BSA (5  $\mu$ g/mL)  
379 and untreated HeLa cells served as controls. Images were captured at 10X magnification using a  
380 Leica DMI8 inverted microscope (Leica Microsystems, Germany). Adherent cells, before and after  
381 4 h exposure to either rLA3490 or t3490, were counted using Leica Application Suite X (Leica  
382 Microsystems, Germany).

383  
384 ***Live/dead and F-actin staining, and LDH assay.*** HeLa cells were treated with 5  $\mu$ g/mL of  
385 rLA3490 or t3490 for 4 h. The monolayer was washed twice with 1X PBS, pH 7.4. Two hundred  
386 microliters of 2  $\mu$ M calcein AM/4  $\mu$ M ethidium homodimer-1 in PBS (Live/Dead<sup>®</sup> Viability Kit,  
387 Invitrogen, USA) were added to the wells and plates incubated for 30 min in the dark. Monolayers  
388 were washed with PBS pH 7.4 to mitigate non-specific, background fluorescence. BSA and  
389 untreated HeLa cells were used as controls. Images were taken using a Leica DMI8 microscope at  
390 10x magnification with appropriate excitation and emission filters for green (live cell) and for red  
391 (dead) fluorescence. In addition, cell damage was quantified by assaying the release of lactate  
392 dehydrogenase (CyQUANT<sup>™</sup> LDH Cytotoxicity Assay, Invitrogen, USA).

393 For F-actin staining, cell monolayers were exposed for up to 1 h, washed twice with PBS,  
394 pH 7.4, and then fixed with 4% paraformaldehyde (Sigma-Aldrich, USA) for 30 minutes at room  
395 temperature. Following aspiration of the fixative, monolayers were washed twice with PBS, then  
396 0.1% Triton X-100 in PBS was added to each well for 5 minutes prior to repeat washes with PBS.  
397 Monolayers were incubated with phalloidin Alexa\_488nm conjugate (Invitrogen, USA) at room  
398 temperature for 30 minutes in the dark per manufacturer's directions. Nuclei were stained with 0.1

399  $\mu\text{g}/\text{mL}$  of ProLong™ Gold Antifade Mountant with DAPI (Invitrogen, USA) for 10 minutes. All  
400 images were taken using a Leica DMI8 microscope with appropriate filters (Alexa\_488nm (green),  
401 DAPI (blue)) at 40x magnification.

402  
403 ***Internalization of rLA3490 by HeLa cells.*** HeLa cells were seeded in 8 well chamber slides  
404 (LabTek, USA) and incubated as described above. Monolayers were treated with 5  $\mu\text{g}/\text{mL}$  of  
405 rLA3490 or t3490 for up to 60 minutes, washed twice with PBS, and then stained with CellMask™  
406 Green Plasma Membrane Stain (Invitrogen, USA) per manufacturer's directions. Images were  
407 taken using a Leica SP8 Gated STED 3X super resolution confocal microscope (Leica  
408 Microsystems, Germany) at 100x with appropriate filters.

409  
410 ***Statistical analysis.*** All experiments were performed in triplicate. Results were expressed as mean  
411 and standard deviation and non-parametric *t*-test was used to assess statistical significance in Graph  
412 Prism 8.

413

#### 414 **Acknowledgments**

415 The work reported benefitted from the use of a (knockout) mutant strain of *L. interrogans* serovar  
416 Manilae containing a transposon inactivated LA3490 ortholog that was a kind gift of Ben Adler,  
417 Gerald Murray and Mathieu Picardeau.

418

#### 419 **Conflict of interest**

420 The authors declare that there is no conflict of interest regarding the publication of this paper.

421

## 422 **References**

- 423 1. Costa F, Hagan JE, Calcagno J, Kane M, Torgerson P, Martinez-Silveira MS, et al. Global  
424 Morbidity and Mortality of Leptospirosis: A Systematic Review. *PLoS Negl Trop Dis*.  
425 2015;9(9):e0003898.
- 426 2. Rudd KE, Johnson SC, Agesa KM, Shackelford KA, Tsoi D, Kievlan DR, et al. Global,  
427 regional, and national sepsis incidence and mortality, 1990-2017: analysis for the Global  
428 Burden of Disease Study. *Lancet*. 2020;395(10219):200-11.
- 429 3. Torgerson PR, Hagan JE, Costa F, Calcagno J, Kane M, Martinez-Silveira MS, et al. Global  
430 Burden of Leptospirosis: Estimated in Terms of Disability Adjusted Life Years. *PLoS Negl*  
431 *Trop Dis*. 2015;9(10):e0004122.
- 432 4. Jimenez JIS, Marroquin JLH, Richards GA, Amin P. Leptospirosis: Report from the task force  
433 on tropical diseases by the World Federation of Societies of Intensive and Critical Care  
434 Medicine. *Journal of critical care*. 2018;43:361-5.
- 435 5. Ellis WA. Animal leptospirosis. *Curr Top Microbiol Immunol*. 2015;387:99-137.
- 436 6. Ko AI, Goarant C, Picardeau M. *Leptospira*: the dawn of the molecular genetics era for an  
437 emerging zoonotic pathogen. *Nat Rev Microbiol*. 2009;7(10):736-47.
- 438 7. Adler B, de la Pena Moctezuma A. *Leptospira* and leptospirosis. *Vet Microbiol*. 2010;140(3-  
439 4):287-96.
- 440 8. Haake DA, Levett PN. Leptospirosis in humans. *Curr Top Microbiol Immunol*. 2015;387:65-  
441 97.
- 442 9. Evangelista KV, Coburn J. *Leptospira* as an emerging pathogen: a review of its biology,  
443 pathogenesis and host immune responses. *Future Microbiol*. 2010;5(9):1413-25.

- 444 10. Chin VK, Basir R, Nordin SA, Abdullah M, Sekawi Z. Pathology and Host Immune Evasion  
445 During Human Leptospirosis: a Review. *Int Microbiol.* 2019.
- 446 11. Picardeau M. Virulence of the zoonotic agent of leptospirosis: still terra incognita? *Nat Rev*  
447 *Microbiol.* 2017;15(5):297-307.
- 448 12. Fouts DE, Matthias MA, Adhikarla H, Adler B, Amorim-Santos L, Berg DE, et al. What  
449 Makes a Bacterial Species Pathogenic?:Comparative Genomic Analysis of the Genus  
450 *Leptospira*. *PLoS Negl Trop Dis.* 2016;10(2):e0004403.
- 451 13. Matsunaga J, Lo M, Bulach DM, Zuerner RL, Adler B, Haake DA. Response of *Leptospira*  
452 *interrogans* to physiologic osmolarity: relevance in signaling the environment-to-host  
453 transition. *Infect Immun.* 2007;75(6):2864-74.
- 454 14. Lehmann JS, Fouts DE, Haft DH, Cannella AP, Ricaldi JN, Brinkac L, et al. Pathogenomic  
455 inference of virulence-associated genes in *Leptospira interrogans*. *PLoS Negl Trop Dis.*  
456 2013;7(10):e2468.
- 457 15. Kelley LA, Mezulis S, Yates CM, Wass MN, Sternberg MJ. The Phyre2 web portal for protein  
458 modeling, prediction and analysis. *Nat Protoc.* 2015;10(6):845-58.
- 459 16. Dawson RM, Paddle BM, Alderton MR. Characterization of the Asialofetuin microtitre plate-  
460 binding assay for evaluating inhibitors of ricin lectin activity. *J Appl Toxicol.* 1999;19(5):307-  
461 12.
- 462 17. Blome MC, Petro KA, Schengrund CL. Surface plasmon resonance analysis of ricin binding  
463 to plasma membranes isolated from NIH 3T3 cells. *Anal Biochem.* 2010;396(2):212-6.
- 464 18. Xu Y, Zhu Y, Wang Y, Chang YF, Zhang Y, Jiang X, et al. Whole genome sequencing  
465 revealed host adaptation-focused genomic plasticity of pathogenic *Leptospira*. *Sci Rep.*  
466 2016;6:20020.

- 467 19. Marcsisin RA, Bartpho T, Bulach DM, Srikrum A, Sermswan RW, Adler B, et al. Use of a  
468 high-throughput screen to identify *Leptospira* mutants unable to colonize the carrier host or  
469 cause disease in the acute model of infection. *Journal of Medical Microbiology*.  
470 2013;62:1601-8.
- 471 20. Murray GL, Morel V, Cerqueira GM, Croda J, Srikrum A, Henry R, et al. Genome-wide  
472 transposon mutagenesis in pathogenic *Leptospira* species. *Infect Immun*. 2009;77(2):810-6.
- 473 21. Mullins KE, Hang J, Jiang J, Leguia M, Kasper MR, Maguina C, et al. Molecular typing of  
474 "*Candidatus Bartonella ancashi*," a new human pathogen causing verruga peruana. *J Clin*  
475 *Microbiol*. 2013;51(11):3865-8.
- 476 22. Blazes DL, Mullins K, Smoak BL, Jiang J, Canal E, Solorzano N, et al. Novel *Bartonella*  
477 agent as cause of verruga peruana. *Emerg Infect Dis*. 2013;19(7):1111-4.
- 478 23. Olsnes S, Refsnes K, Pihl A. Mechanism of action of the toxic lectins abrin and ricin. *Nature*.  
479 1974;249(458):627-31.
- 480 24. Bumba L, Masin J, Fiser R, Sebo P. *Bordetella* adenylate cyclase toxin mobilizes its beta2  
481 integrin receptor into lipid rafts to accomplish translocation across target cell membrane in  
482 two steps. *PLoS Pathog*. 2010;6(5):e1000901.
- 483 25. Leppla SH. Anthrax toxin edema factor: a bacterial adenylate cyclase that increases cyclic  
484 AMP concentrations of eukaryotic cells. *Proc Natl Acad Sci U S A*. 1982;79(10):3162-6.
- 485 26. Rudkin JK, McLoughlin RM, Preston A, Massey RC. Bacterial toxins: Offensive, defensive,  
486 or something else altogether? *PLoS Pathog*. 2017;13(9):e1006452.
- 487 27. Spangler BD. Structure and function of cholera toxin and the related *Escherichia coli* heat-  
488 labile enterotoxin. *Microbiol Rev*. 1992;56(4):622-47.

- 489 28. Galan JE. Typhoid toxin provides a window into typhoid fever and the biology of Salmonella  
490 Typhi. *Proc Natl Acad Sci U S A*. 2016;113(23):6338-44.
- 491 29. Olson R, Gouaux E. Vibrio cholerae cytolysin is composed of an alpha-hemolysin-like core.  
492 *Protein Sci*. 2003;12(2):379-83.
- 493 30. Cummings RD, Schnaar RL. Chapter 31: R-Type Lectins. In: Varki A, Cummings RD, Esko  
494 JD, editors. *Essentials of Glycobiology* [Internet] 3rd edition. Cold Spring Harbor (NY): Cold  
495 Spring Harbor Laboratory Press; 2017.
- 496 31. Sehnke PC, Pedrosa L, Paul AL, Frankel AE, Ferl RJ. Expression of active, processed ricin  
497 in transgenic tobacco. *J Biol Chem*. 1994;269(36):22473-6.
- 498 32. Ahuja N, Kumar P, Bhatnagar R. The adenylate cyclase toxins. *Crit Rev Microbiol*.  
499 2004;30(3):187-96.
- 500 33. Narayanavari SA, Lourdault K, Sritharan M, Haake DA, Matsunaga J. Role of sph2 Gene  
501 Regulation in Hemolytic and Sphingomyelinase Activities Produced by *Leptospira*  
502 *interrogans*. *PLoS Negl Trop Dis*. 2015;9(8):e0003952.
- 503 34. Sehgal SC, Murhekar MV, Sugunan AP. Outbreak of leptospirosis with pulmonary  
504 involvement in north Andaman. *Indian J Med Res*. 1995;102:9-12.
- 505 35. Gouveia EL, Metcalfe J, de Carvalho AL, Aires TS, Villasboas-Bisneto JC, Queiroz A, et al.  
506 Leptospirosis-associated severe pulmonary hemorrhagic syndrome, Salvador, Brazil. *Emerg*  
507 *Infect Dis*. 2008;14(3):505-8.
- 508 36. Helmerhorst HJ, van Tol EN, Tuinman PR, de Vries PJ, Hartskeerl RA, Grobusch MP, et al.  
509 Severe pulmonary manifestation of leptospirosis. *Neth J Med*. 2012;70(5):215-21.
- 510 37. Truong KN, Coburn J. The emergence of severe pulmonary hemorrhagic leptospirosis:  
511 questions to consider. *Front Cell Infect Microbiol*. 2011;1:24.

- 512 38. Ruwanpura R, Rathnaweera A, Hettiarachchi M, Dhahanayake K, Amararatne S. Severe  
513 pulmonary leptospirosis associated with high fatality rate: an autopsy series in galle, southern  
514 sri lanka. *Med J Malaysia*. 2012;67(6):595-600.
- 515 39. Ko AI, Galvao Reis M, Dourado CMR, Johnson WD, Riley LW. Urban epidemic of severe  
516 leptospirosis in Brazil. *Lancet*. 1999;354:820-5.
- 517 40. Segura E, Ganoza C, Campos K, Ricaldi JN, Torres S, Silva H, et al. Clinical spectrum of  
518 pulmonary involvement in leptospirosis in an endemic region, with quantification of  
519 leptospiral burden. *Clin Infect Dis*. 2005;40:343-51.
- 520 41. Marotto PC, Nascimento CM, Eluf-Neto J, Marotto MS, Andrade L, Sztajn bok J, et al. Acute  
521 lung injury in leptospirosis: clinical and laboratory features, outcome, and factors associated  
522 with mortality. *Clin Infect Dis*. 1999;29(6):1561-3.
- 523 42. Andrade L, Cleto S, Seguro AC. Door-to-dialysis time and daily hemodialysis in patients with  
524 leptospirosis: impact on mortality. *Clin J Am Soc Nephrol*. 2007;2(4):739-44.
- 525 43. Cleto SA, Rodrigues CE, Malaque CM, Sztajn bok J, Seguro AC, Andrade L.  
526 Hemodiafiltration Decreases Serum Levels of Inflammatory Mediators in Severe  
527 Leptospirosis: A Prospective Study. *PLoS One*. 2016;11(8):e0160010.
- 528 44. Nicodemo AC, Duarte MIS, Alves VAF, Takakura CFH, Santos RTM, Nicodemo EL. Lung  
529 lesions in human leptospirosis: Microscopic, Immunohistochemical, and ultrastructural  
530 features related to thrombocytopenia. *American Journal of Tropical Medicine and Hygiene*.  
531 1997;56(2):181-7.
- 532 45. Nally JE, Chantranuwat C, Wu XY, Fishbein MC, Pereira MM, Da Silva JJ, et al. Alveolar  
533 septal deposition of immunoglobulin and complement parallels pulmonary hemorrhage in a  
534 guinea pig model of severe pulmonary leptospirosis. *Am J Pathol*. 2004;164(3):1115-27.



- 535 46. Croda J, Neto AN, Brasil RA, Pagliari C, Nicodemo AC, Duarte MI. Leptospirosis pulmonary  
536 haemorrhage syndrome is associated with linear deposition of immunoglobulin and  
537 complement on the alveolar surface. *Clin Microbiol Infect.* 2010;16(6):593-9.
- 538 47. De Brito T, Aiello VD, da Silva LF, Goncalves da Silva AM, Ferreira da Silva WL, Castelli  
539 JB, et al. Human hemorrhagic pulmonary leptospirosis: pathological findings and  
540 pathophysiological correlations. *PLoS One.* 2013;8(8):e71743.
- 541 48. Sperti S, Montanaro L, Mattioli A, Stirpe F. Inhibition by ricin of protein synthesis in vitro:  
542 60 S ribosomal subunit as the target of the toxin. *Biochem J.* 1973;136(3):813-5.
- 543 49. Montanaro L, Sperti S, Stirpe F. Inhibition by ricin of protein synthesis in vitro. *Ribosomes*  
544 *as the target of the toxin. Biochem J.* 1973;136(3):677-83.
- 545 50. Lord MJ, Jolliffe NA, Marsden CJ, Pateman CS, Smith DC, Spooner RA, et al. Ricin.  
546 *Mechanisms of cytotoxicity. Toxicol Rev.* 2003;22(1):53-64.
- 547 51. Sowa-Rogozinska N, Sominka H, Nowakowska-Golacka J, Sandvig K, Slominska-  
548 Wojewodzka M. Intracellular Transport and Cytotoxicity of the Protein Toxin Ricin. *Toxins*  
549 *(Basel).* 2019;11(6).
- 550 52. Cemal G. Design and construction of membrane-acting immunotoxins for intracellular and  
551 secreted protein expression in *Pichia pastoris*. Thesis1999.
- 552 53. Brown JE, Ussery MA, Leppla SH, Rothman SW. Inhibition of protein synthesis by Shiga  
553 toxin: activation of the toxin and inhibition of peptide elongation. *FEBS Lett.* 1980;117(1):84-  
554 8.
- 555 54. Cherubin P, Quinones B, Teter K. Cellular recovery from exposure to sub-optimal  
556 concentrations of AB toxins that inhibit protein synthesis. *Sci Rep.* 2018;8(1):2494.

- 557 55. Coutte L, Locht C. Investigating pertussis toxin and its impact on vaccination. Future  
558 Microbiol. 2015;10(2):241-54.
- 559 56. Frankel AE, Burbage C, Fu T, Tagge E, Chandler J, Willingham MC. Ricin toxin contains at  
560 least three galactose-binding sites located in B chain subdomains 1 alpha, 1 beta, and 2  
561 gamma. Biochemistry. 1996;35(47):14749-56.
- 562 57. Wales R, Gorham HC, Hussain K, Roberts LM, Lord JM. Ricin B chain fragments expressed  
563 in Escherichia coli are able to bind free galactose in contrast to the full length polypeptide.  
564 Glycoconj J. 1994;11(4):274-81.
- 565 58. Ellinghausen HC, Jr., McCullough WG. Nutrition of *Leptospira Pomona* and Growth of 13  
566 Other Serotypes: A Serum-Free Medium Employing Oleic Albumin Complex. Am J Vet Res.  
567 1965;26:39-44.
- 568 59. Matsunaga J, Sanchez Y, Xu X, Haake DA. Osmolarity, a key environmental signal  
569 controlling expression of leptospiral proteins LigA and LigB and the extracellular release of  
570 LigA. Infect Immun. 2005;73(1):70-8.
- 571 60. Jin D, Ojcius DM, Sun D, Dong H, Luo Y, Mao Y, et al. *Leptospira interrogans* induces  
572 apoptosis in macrophages via caspase-8- and caspase-3-dependent pathways. Infect Immun.  
573 2009;77(2):799-809.
- 574 61. Laemmli UK. Cleavage of structural proteins during the assembly of the head of  
575 bacteriophage T4. Nature. 1970;227(5259):680-5.
- 576

577  
578

**Table 1. PF07598 gene family members in select Group 1 pathogenic *Leptospira***

| <i>L. interrogans</i> serovar Lai strain 56601 |                        |            | <i>L. interrogans</i> serovar Copenhageni strain 495 |                        |            | <i>L. interrogans</i> serovar Manilae strain 495 |                            |            |
|------------------------------------------------|------------------------|------------|------------------------------------------------------|------------------------|------------|--------------------------------------------------|----------------------------|------------|
| Gene locus                                     | Reference / Protein ID | Amino acid | Gene locus                                           | Reference / Protein ID | Amino acid | Gene locus                                       | Reference / Protein ID     | Amino acid |
| LA_3388                                        | <a href="#">Q8F0V3</a> | 631        | LIC_10778                                            | <a href="#">Q72U83</a> | 631        | LMANV2_260038                                    | <a href="#">A0A2H1XD57</a> | 631        |
| LA_0835                                        | <a href="#">Q8F7V7</a> | 631        | LIC_12791                                            | <a href="#">Q72NP1</a> | 631        | LMANV2_240079                                    | <a href="#">A0A2H1XD04</a> | 438        |
| <b>LA_0591<sup>#</sup></b>                     | <a href="#">Q8F8G6</a> | 313        | LIC_12985 <sup>#</sup>                               | <a href="#">Q72N53</a> | 313        | LMANV2_70075 <sup>#</sup>                        | <a href="#">A0A2H1XLT9</a> | 314        |
| <b>LA_0589<sup>v</sup></b>                     | <a href="#">Q8F8G8</a> | 632        | LIC_12986                                            | <a href="#">Q72N52</a> | 632        | LMANV2_70078                                     | <a href="#">A0A2H1XJZ3</a> | 549        |
| LA_1402                                        | <a href="#">Q8F6A7</a> | 641        | LIC_12339                                            | <a href="#">Q72PX8</a> | 663        | LMANV2_210058                                    | <a href="#">A0A2H1XCB0</a> | 640        |
| LA_1400                                        | <a href="#">Q8F6A9</a> | 573        | LIC_12340                                            | <a href="#">Q72PX7</a> | 627        | LMANV2_210056                                    | <a href="#">A0A2H1XC81</a> | 627        |
| LA_3271                                        | <a href="#">Q8F166</a> | 636        | LIC_10870                                            | <a href="#">Q72TZ4</a> | 636        | LMANV2_80114                                     | <a href="#">A0A2H1XKP0</a> | 638        |
| LA_0934                                        | <a href="#">Q8F7L0</a> | 638        | LIC_12715                                            | <a href="#">Q72NW3</a> | 638        | LMANV2_320010                                    | <a href="#">A0A2H1XE97</a> | 638        |
| LA_0769                                        | <a href="#">Q8F820</a> | 602        | LIC_12844                                            | <a href="#">Q72NJ0</a> | 639        | LMANV2_240142                                    | <a href="#">A0A2H1XCY6</a> | 639        |
| LA_2628                                        | <a href="#">Q8F2Y3</a> | 638        | LIC_11358                                            | <a href="#">Q72SM1</a> | 638        | LMANV2_150103                                    | <a href="#">A0A2H1XAR4</a> | 638        |
| NA                                             | -                      | -          | LIC_10639                                            | <a href="#">Q72UL8</a> | 640        | LMANV2_170032                                    | <a href="#">A0A2H1XAY7</a> | 638        |
| LA_0620                                        | <a href="#">Q8F8D7</a> | 637        | LIC_12963                                            | <a href="#">Q72N74</a> | 637        | LMANV2_70050                                     | <a href="#">A0A2H1XJU7</a> | 637        |
| LA_3490                                        | <a href="#">Q8F0K3</a> | 639        | LIC_10695                                            | <a href="#">Q72UG2</a> | 639        | LMANV2_170091                                    | <a href="#">A0A2H1XB88</a> | 637        |

579 NA Not applicable due to a missing ortholog  
580 <sup>#</sup> Signal peptide and complete C-terminal fragment but missing entire N-terminal ricin B chain-like binding domain  
581 <sup>v</sup> Only mutant unable to infect hamster

582 **Table 2. Average amino acid identity of LA3490 found in important *L. interrogans* serovars (full-length, N-terminal**  
 583 **carbohydrate binding domain and C-terminal putative toxin domain shown).**  
 584

| Serovars                       | Lai                        |                                 |      |                    |                                 |
|--------------------------------|----------------------------|---------------------------------|------|--------------------|---------------------------------|
|                                | UniProt Protein ID         | LA_3490/ <a href="#">Q8F0K3</a> |      | Uniprot Protein ID | LA_0620/ <a href="#">Q8F8D7</a> |
| Copenhageni                    | <a href="#">Q72UG2</a>     | 99.7                            |      | 99.7               |                                 |
|                                |                            | 99.6                            | 99.7 | 99.6               | 99.7                            |
| Manilae                        | <a href="#">A0A2H1XB88</a> | 97.4                            |      | 98.5               |                                 |
|                                |                            | 98.7                            | 98.4 | 97.8               | 98.9                            |
| Canicola                       | <a href="#">A0A1X8WIC7</a> | 99.7                            |      | 97.6               |                                 |
|                                |                            | 97.8                            | 99.7 | 97.8               | 97.3                            |
| Hardjo subtype <i>prajitno</i> | <a href="#">A0A0M4NB61</a> | 100                             |      | 99.7               |                                 |
|                                |                            | 100                             | 100  | 99.1               | 100                             |
| Pomona                         | <a href="#">A0A163QL98</a> | 93.5                            |      | 97.4               |                                 |
|                                |                            | 97.3                            | 97.3 | 97.3               | 97.3                            |
| Amino acid identity            |                            | 98.4                            |      | 98.6               |                                 |
|                                |                            | 98.9                            | 98.9 | 99.1               | 98.9                            |

585

- Full length
- Putative N-terminal ricin B-chain domain
- Putative C-terminal enzymatic domain

587 **Supporting Information**

588 **S1 Figure.** Amino acid multiple sequence alignment of all full length PF07598 paralogs present  
589 in serovars Lai, Copenhageni, Canicola, Hardjo and Pomona.

590  
591 **S1 Appendices (1-3).** Pairwise distance matrices of full-length (S1 Appendix 1), N-terminal ricin  
592 B chain-like carbohydrate binding domain (S1 Appendix 2) and C-terminal toxin domain (S1  
593 Appendix 3). Pairwise distances of Lai, Copenhageni and Canicola have been conditionally  
594 formatted, and all others de-emphasized for easier viewing. Cells colored shades of green indicate  
595 low amino acid identity —darker shades = lowest; whereas those colored shades of blue indicate  
596 higher amino acid identity —darker shades = highest. Orthologous pairs have been indicated.

597  
598 **S1 Video. Time-lapse video showing cytopathic effect in rLA3490-treated HeLa cells as early**  
599 **as 50 min post-exposure.** Time-lapse images (40 frames, 5 s intervals) of rLA3490-treated HeLa  
600 cells, 0 to 4 h post-exposure showing noticeable cytopathic effect as early as 50 minutes post-  
601 exposure. rLA3490 was added at a final concentration of 5  $\mu\text{g}/\text{mL}$ . Images were captured using a  
602 Leica DMI8 inverted microscope at 40x magnification. Scale bar 10  $\mu\text{m}$ .

603  
604 **S2 Video. Time-lapse video of untreated HeLa cells up to four hours post-exposure.** Time-  
605 lapse images (40 frames, 5 s intervals) of untreated HeLa cells (control) 0 to 4 h post-exposure  
606 showing no morphological changes. Images were captured using a Leica DMI8 inverted  
607 microscope at 40x magnification. Scale bar 10  $\mu\text{m}$ .

608

609 **S3 Video. Orthogonal projections of t3490-treated HeLa cells, 30 min post-exposure.** Top left  
610 and bottom right panels show binding of mCherry-t3490 fusion protein (red) at HeLa cell surface  
611 30 minutes post-exposure. Plasma membrane and nucleus stained with CellMask™ Green Plasma  
612 Membrane Stain and ProLong™ Gold Antifade Mountant with DAPI (blue), respectively. Images  
613 captured using a Leica SP8 Gated STED 3X super-resolution confocal microscope. Magnification  
614 100x.

615  
616 **S4 Video. Orthogonal projections of t3490-treated HeLa cells, 60 min post-exposure.** Top left  
617 and bottom right panels show binding of mCherry-t3490 fusion at HeLa cell surface 60 minutes  
618 post-exposure. Plasma membrane and nucleus stained with CellMask™ Green Plasma Membrane  
619 Stain and ProLong™ Gold Antifade Mountant with DAPI, respectively. Images captured using a  
620 Leica SP8 Gated STED 3X super-resolution confocal microscope. Magnification 100x.

621  
622 **S5 Video. Z-stacks of t3490-treated HeLa cells, 30 min post-exposure.** Animation of 24 cross-  
623 sectional images (total depth, 6.87  $\mu\text{m}$ ; separation, 298.5 nm), with binding of mCherry-t3490  
624 fusion evident at HeLa cell surface. Cells were washed twice with PBS, and the plasma membrane  
625 and nucleus stained with CellMask™ Green Plasma Membrane Stain and ProLong™ Gold  
626 Antifade Mountant with DAPI, respectively. Images captured using a Leica SP8 Gated STED 3X  
627 super-resolution confocal microscope. Magnification 100x.

628  
629 **S6 Video. Z-stacks of t3490-treated HeLa cells, 60 min post-exposure.** Animation of 32 cross-  
630 sectional images (total depth, 9.25  $\mu\text{m}$ ; separation, 298.5 nm), with binding of mCherry-t3490  
631 fusion still evident on HeLa cell surface (i.e. no internalization). Cells were washed twice with

632 PBS, and plasma membrane and nucleus stained with CellMask™ Green Plasma Membrane Stain  
633 and ProLong™ Gold Antifade Mountant with DAPI, respectively. Images captured using a Leica  
634 SP8 Gated STED 3X super-resolution confocal microscope. Magnification 100x.

635  
636 **S7 Video. Orthogonal projections of HeLa cells treated with rLA3490, 30 min post-exposure.**

637 mCherryr-LA3490 fusion on the HeLa cell surface 30 minutes of post-exposure, with  
638 internalization evident (top left, runtime 3 s; and bottom right, runtime 10 s). Plasma membrane  
639 and nucleus were stained with CellMask™ Green Plasma Membrane Stain and ProLong™ Gold  
640 Antifade Mountant with DAPI, respectively. Images were captured using a Leica SP8 Gated STED  
641 3X super-resolution confocal microscope. Magnification 100x.

642  
643 **S8 Video. Orthogonal projections of HeLa cells treated with rLA3490, 60 min post-exposure.**

644 Internalized mCherryr-LA3490 fusion evident in all four images. Plasma membrane and nucleus  
645 were stained with CellMask™ Green Plasma Membrane Stain and ProLong™ Gold Antifade  
646 Mountant with DAPI, respectively. Images were captured using a Leica SP8 Gated STED 3X  
647 super-resolution confocal microscope. Magnification 100x.

648  
649 **S9 Video. Z-stacks of HeLa cells treated with rLA3490, 30 min post-exposure.** Animation of

650 35 cross-sectional images (total depth, 10.15  $\mu\text{m}$ ; separation, 298.5 nm) showing binding of  
651 mCherry-rLA3490 fusion to HeLa cell surface. Plasma membrane and nucleus were stained with  
652 CellMask™ Green Plasma Membrane Stain and ProLong™ Gold Antifade Mountant with DAPI,  
653 respectively. Images were captured using a Leica SP8 Gated STED 3X super-resolution confocal  
654 microscope. Magnification 100x.

655

656 **S10 Video. Z-stacks of HeLa cells treated with rLA3490, 60 min post-exposure.** Animation of  
657 42 cross-sectional images (total depth, 12.24  $\mu\text{m}$ ; separation, 298.5 nm) showing cell membrane  
658 binding and internalization of mCherry-rLA3490 fusion. Plasma membrane and nucleus stained  
659 with CellMask™ Green Plasma Membrane Stain and ProLong™ Gold Antifade Mountant with  
660 DAPI, respectively. Images captured using a Leica SP8 Gated STED 3X super-resolution confocal  
661 microscope. Magnification 100x.

662

### 663 **Figure legends**

664 **Fig 1. Proposed domain organization of VM proteins, and strategy for cloning of full-length**

665 **and N-terminal ricin B domain of LA3490. (A)** Schematic illustration of VM protein domain

666 organization showing the presence of an N-terminal ricin B domain, hydrophobic patch (\*)

667 presumed to mediate insertion into endosome membrane prior to the extrusion and release of C-

668 terminal toxin domain to the cytosol. **SS**; signal sequences identified by SignalP. All VM proteins

669 share the LA3490 ([Q8F0K3](#); 639 aa) domain organization depicted, though all serovars also

670 contain a short VM protein variant, e.g., LA0591 ([Q8F8G6](#); 313 aa) and LMANV2\_240079

671 ([A0A2H1XD04](#); 438 aa), containing a SS and complete enzymatic domain (with hydrophobic

672 patch) but lacking the entire N-terminal ricin B binding domain. For reference, the domain

673 organization of plant derived ricin (*Ricinus communis*; [P02879](#), 565 aa), the secreted Community-

674 Acquired Respiratory Distress syndrome (CARDs) toxin of *Mycoplasma pneumoniae* ([P75409](#),

675 591 aa) and diphtheria toxin (*Corynebacterium diphtheriae*; [Q5PY51](#), 535 aa) have been included.

676 Unlike VM proteins, the domain order is reversed in these and other “protoxins” typically encoded

677 by a single polypeptide chain. CARDs and diphtheria toxin belong to the family of ADP-

678 ribosylating toxins; whereas, ricin inactivates the ribosome and inhibits protein synthesis. **(B)**



679 Schematic depicting the organization of the recombinant mCherry fusion proteins used in the  
680 current study; **rLA3490** full-length, nucleotide positions 57 - 1920 (minus SS); and **t3490**, 213 -  
681 552, also lacking SS. Recombinant fusions also include a glycine-serine (Gly4S) linker (for  
682 flexibility), C-terminal His6 tag (purification), and two internal enterokinase recognition sites.

683  
684 **Fig 2. Evaluation of the purity of recombinant t3490 and rLA3490 fusion proteins by**  
685 **Western blot and Limulus Amebocyte Lysate assay. (A+B)** Western blot of purified soluble  
686 recombinant proteins confirming the presence single bands of the expected size (**A**, t3490; and **B**,  
687 rLA3490). Membranes were probed with anti-His6 and polyclonal anti-LA3490 antibodies (lane  
688 two and three, respectively). **M** - molecular weight marker. **(C)** Limulus Amebocyte Lysate (LAL)  
689 assay indicating no appreciable endotoxin contamination; *E. coli* LPS used as positive control.  
690 Data were visualized in GraphPad Prism v8.

691  
692 **Fig 3. Asialofetuin- and ricin B chain competitive-binding assay.** Asialofetuin binding assay  
693 confirming that both truncated (**t3490** or **t0620**) and full-length (**rLA3490**) VM proteins bind  
694 asialofetuin in the absence (0 nM) of commercially available ricin B chain; and that binding is  
695 inhibited by increasing concentrations of ricin B chain (25 nM and 50 nM). Assays were performed  
696 in microtiter plates using an ELISA format. Mouse polyclonal anti-LA3490 and anti-LA0620  
697 antibodies (1:1000 dilution) were used as primary and anti-mouse IgG as **secondary antibody** (used  
698 alone as a specificity control). Assays were run in triplicate and experiments repeated at least twice  
699 to assess consistency. The mean absorbance ( $\pm$ SEM) were visualized in GraphPad Prism 8 (data  
700 from a representative experiment shown).

701

702 **Fig 4. HeLa cell morphology and integrity upon exposure to t3490 and rLA3490.** (A) Phase  
703 contrast images showing alteration of HeLa cell morphology following 4 h exposure to 5  $\mu\text{g}/\text{mL}$   
704 of rLA3490, with cell lysis confirmed by the release of lactate dehydrogenase at 1-hour intervals  
705 up to 4 h post exposure (B). No such alterations, nor release of LDH, were observed in BSA-  
706 treated (5  $\mu\text{g}/\text{mL}$ ) or untreated cells (A, B). Images were captured at 10x magnification using a  
707 Leica DMI8 inverted microscope. Scale bar, 100  $\mu\text{m}$ . Mean absorbance of samples run in triplicate  
708 ( $\pm\text{SEM}$ ) were visualized in GraphPad Prism 8.

709  
710 **Fig 5. Integrity of HeLa cell monolayers following exposure to t3490 and rLA3490.** (A)  
711 Live/dead staining of HeLa cell monolayers following 4-h exposure to 5  $\mu\text{g}/\text{mL}$  t3490 (top left  
712 panel) and rLA3490 (bottom left), showing a dramatic decrease of adherent cells and concomitant  
713 accumulation of dead cells upon exposure to rLA3490, but not t3490- or BSA-treated or untreated  
714 monolayers. Images were captured at 10x magnification using a Leica DMI8 inverted microscope.  
715 Scale bar, 100  $\mu\text{m}$ . (B) Cell adherence following 4-h exposure to t3490 and rLA3490. Relative to  
716 BSA treated and untreated controls, rLA3490, but not t3490, significantly reduced the proportion  
717 of adherent cells indicating that N-terminal fragment alone is unable to cause cell death (A, B).  
718 The impact of the various treatments was evaluated via Z-test and considered significant when  $p$   
719  $< 0.05$ , ns = non-significant.

720  
721 **Fig 6. Cytopathic effect of LA3490 knockout mutant strain of *L. interrogans* serovar Manilae**  
722 **and (isogenic) wildtype strain on HeLa cell monolayers.** Phase contrast images of HeLa cell  
723 monolayers in co-culture with three *Leptospira* strains for up to four hours. Row 1: transposon  
724 mutant, M1439, containing an inactivated LA3490 ortholog, LMANV2\_1700091; row 2: isogenic

725 wild type strain; row **3**: low-virulence Group II pathogen, *L. licerasiae* serovar Varillal; and row  
726 **4**: uninfected HeLa cell monolayers (control). To induce expression of LMANV2\_1700091,  
727 *Leptospira* were grown in liquid EMJH supplemented with 120 mM NaCl and 10% rat serum,  
728 mimicking the *in vivo* host environment, then used to infect HeLa cell monolayers at a multiplicity  
729 of infection of 100:1. Infected monolayers were incubated for up to four hours, with images taken  
730 at 1-h intervals for the duration at 10x magnification using a Leica DMI8 confocal microscope.  
731 Scale bar, 100  $\mu$ m.

732

733 **Fig 7. Intracellular trafficking and localization of rLA3490 in HeLa cells.** Confocal images  
734 show that whereas both **mCherry-rLA3490** and **-t3490** fusion proteins bind to the cell surface (**A**  
735 and **B**, respectively), only rLA3490 is internalized. Z-stack images showing **mCherry-rLA3490**  
736 fusion was internalized from 30 min onwards, with nuclear translocation and chromosomal  
737 degradation (evinced by patchy DAPI staining; **A**, panel four, lower right) evident within 60  
738 minutes. Monolayers were exposed to 5  $\mu$ g/mL recombinant fusion protein or BSA for 30 minutes  
739 and 60 minutes (or were left untreated). Cells were washed, stained with CellMask™ Green  
740 Plasma Membrane Stain, and then mounted with ProLong™ Gold Antifade Mountant +DAPI.  
741 Images were captured at 100x using appropriate filters (blue, DAPI; green, plasma membrane; and  
742 red, mCherry fusions).

743

744 **Fig 8. Full-length LA3490 mediated depolymerization of F-actin of HeLa cells.** HeLa cell  
745 monolayers were incubated with 5  $\mu$ g/mL of each of rLA3490 (**A**), t3490 (**B**), and BSA (**C**) up to  
746 1 h. Monolayers were fixed with 4% paraformaldehyde for 30 minutes and then followed by  
747 washes, 0.1% Triton X-100 in PBS was added to each well for 5 minutes. Monolayer was

748 incubated with phalloidin Alexa\_488nm conjugate at room temperature for 30 minutes in dark,  
749 washed twice and then mounted with ProLong™ Gold Antifade Mountant with DAPI for 10  
750 minutes. Images were captured using a Leica DMi8 confocal microscope with appropriate filters  
751 (Alexa\_488nm (green), DAPI (blue)) at 40x magnification. Untreated HeLa cells served as  
752 control **(D)**. Scale bars 20  $\mu$ m.

753

754

755

756

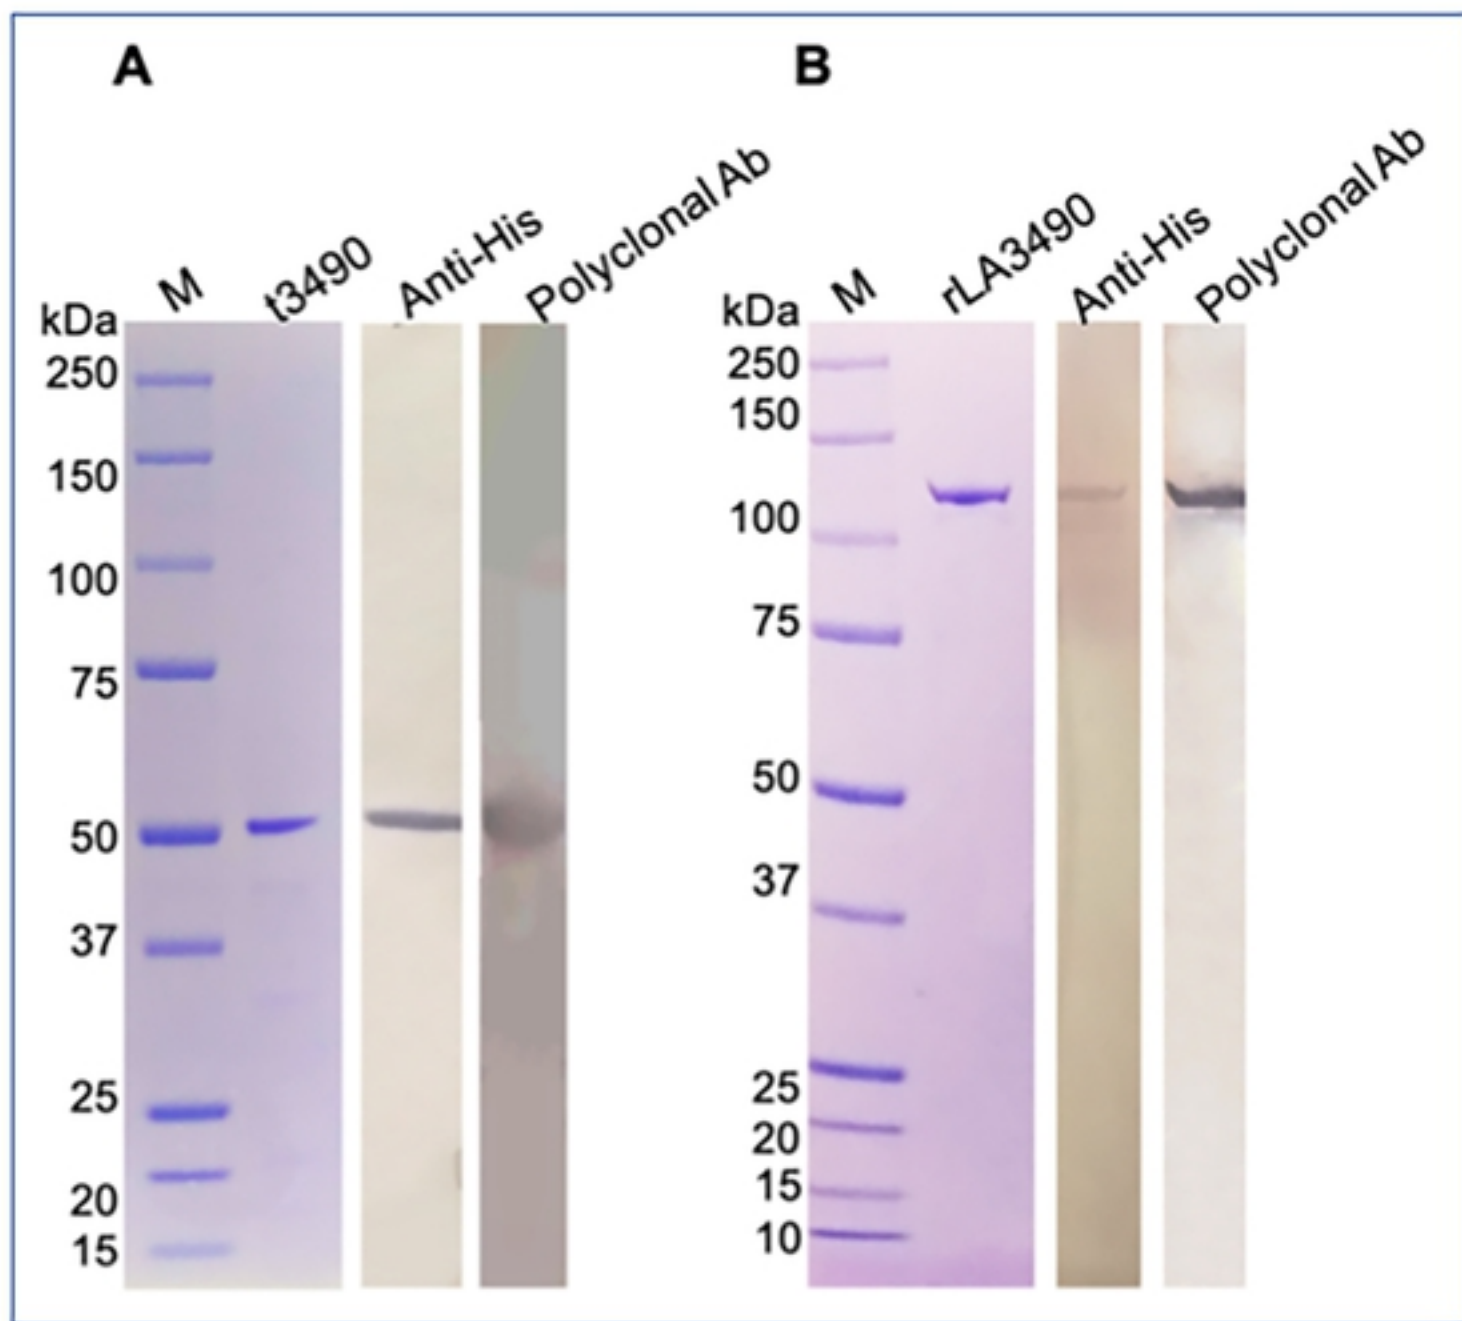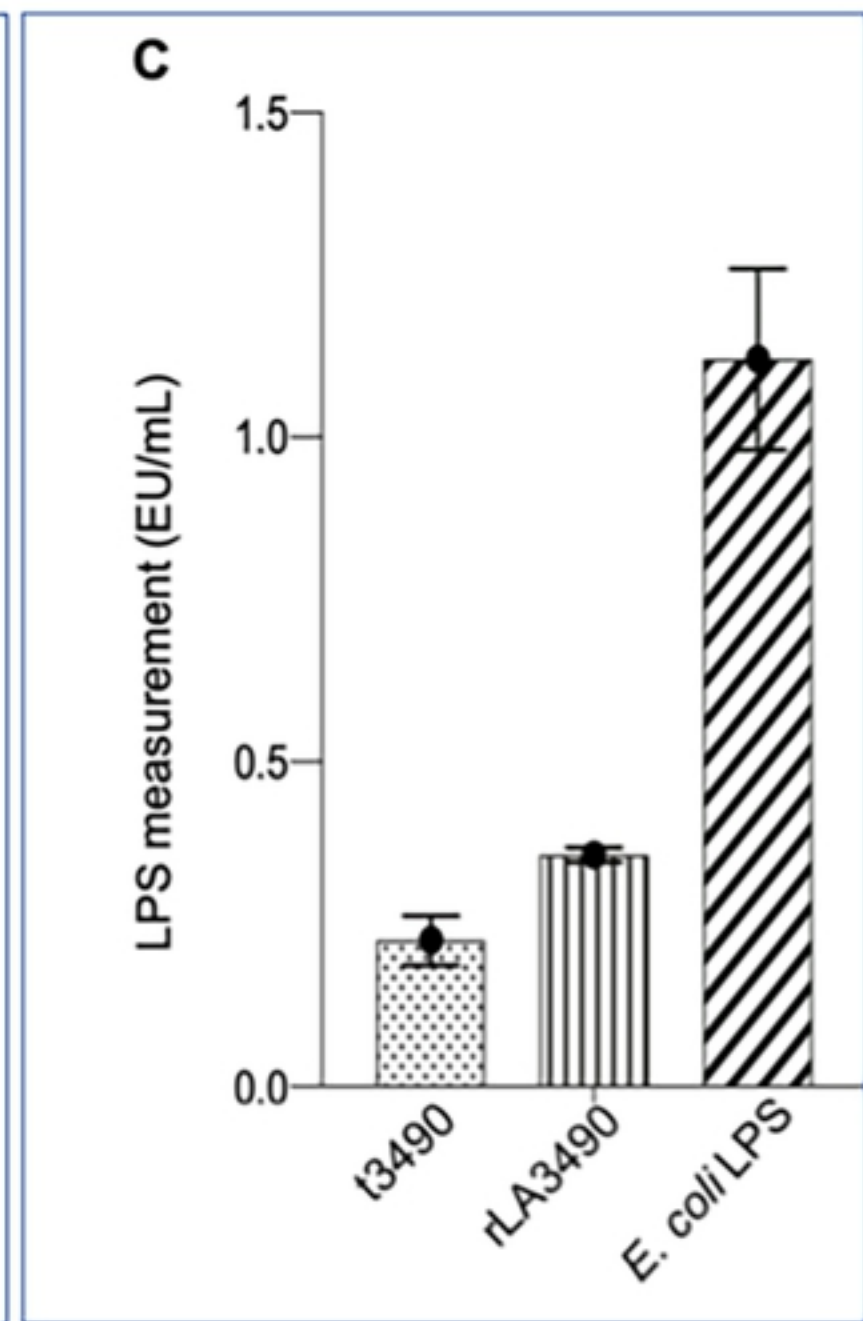

Figure 2

bioRxiv preprint doi: <https://doi.org/10.1101/2020.05.13.094169>; this version posted May 13, 2020. The copyright holder for this preprint (which was not certified by peer review) is the author/funder, who has granted bioRxiv a license to display the preprint in perpetuity. It is made available under aCC-BY 4.0 International license.

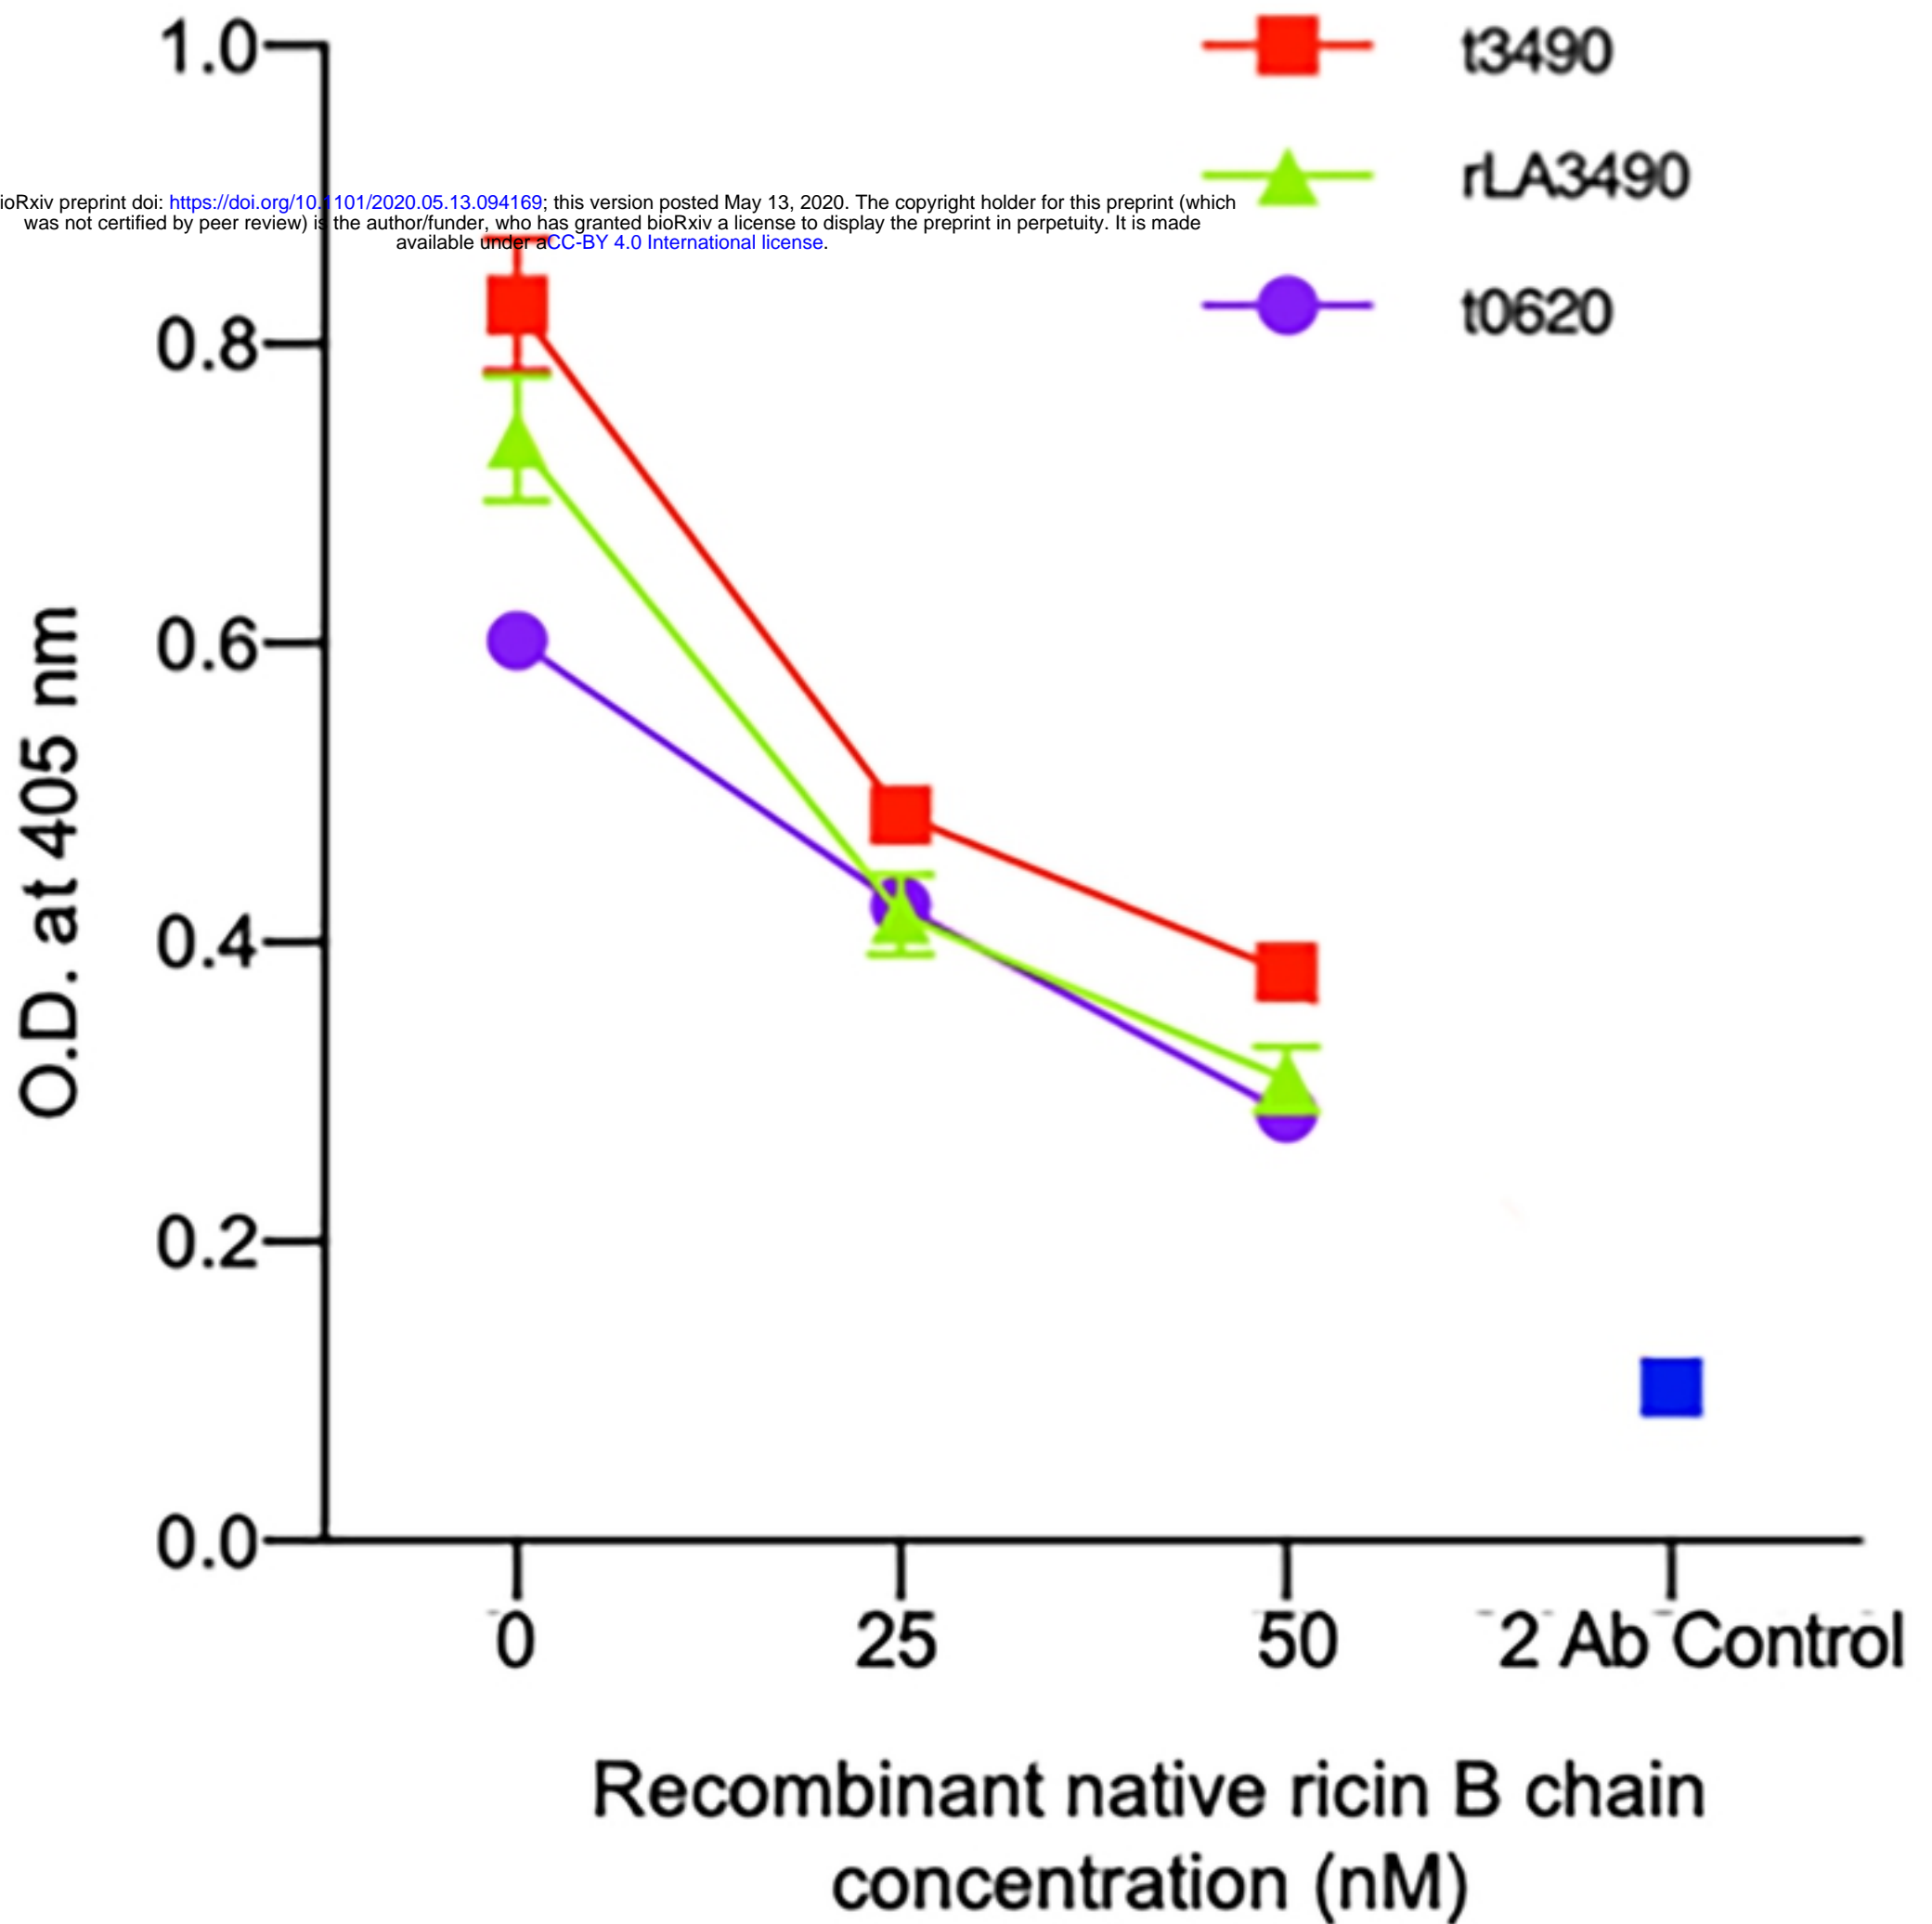

Figure 3

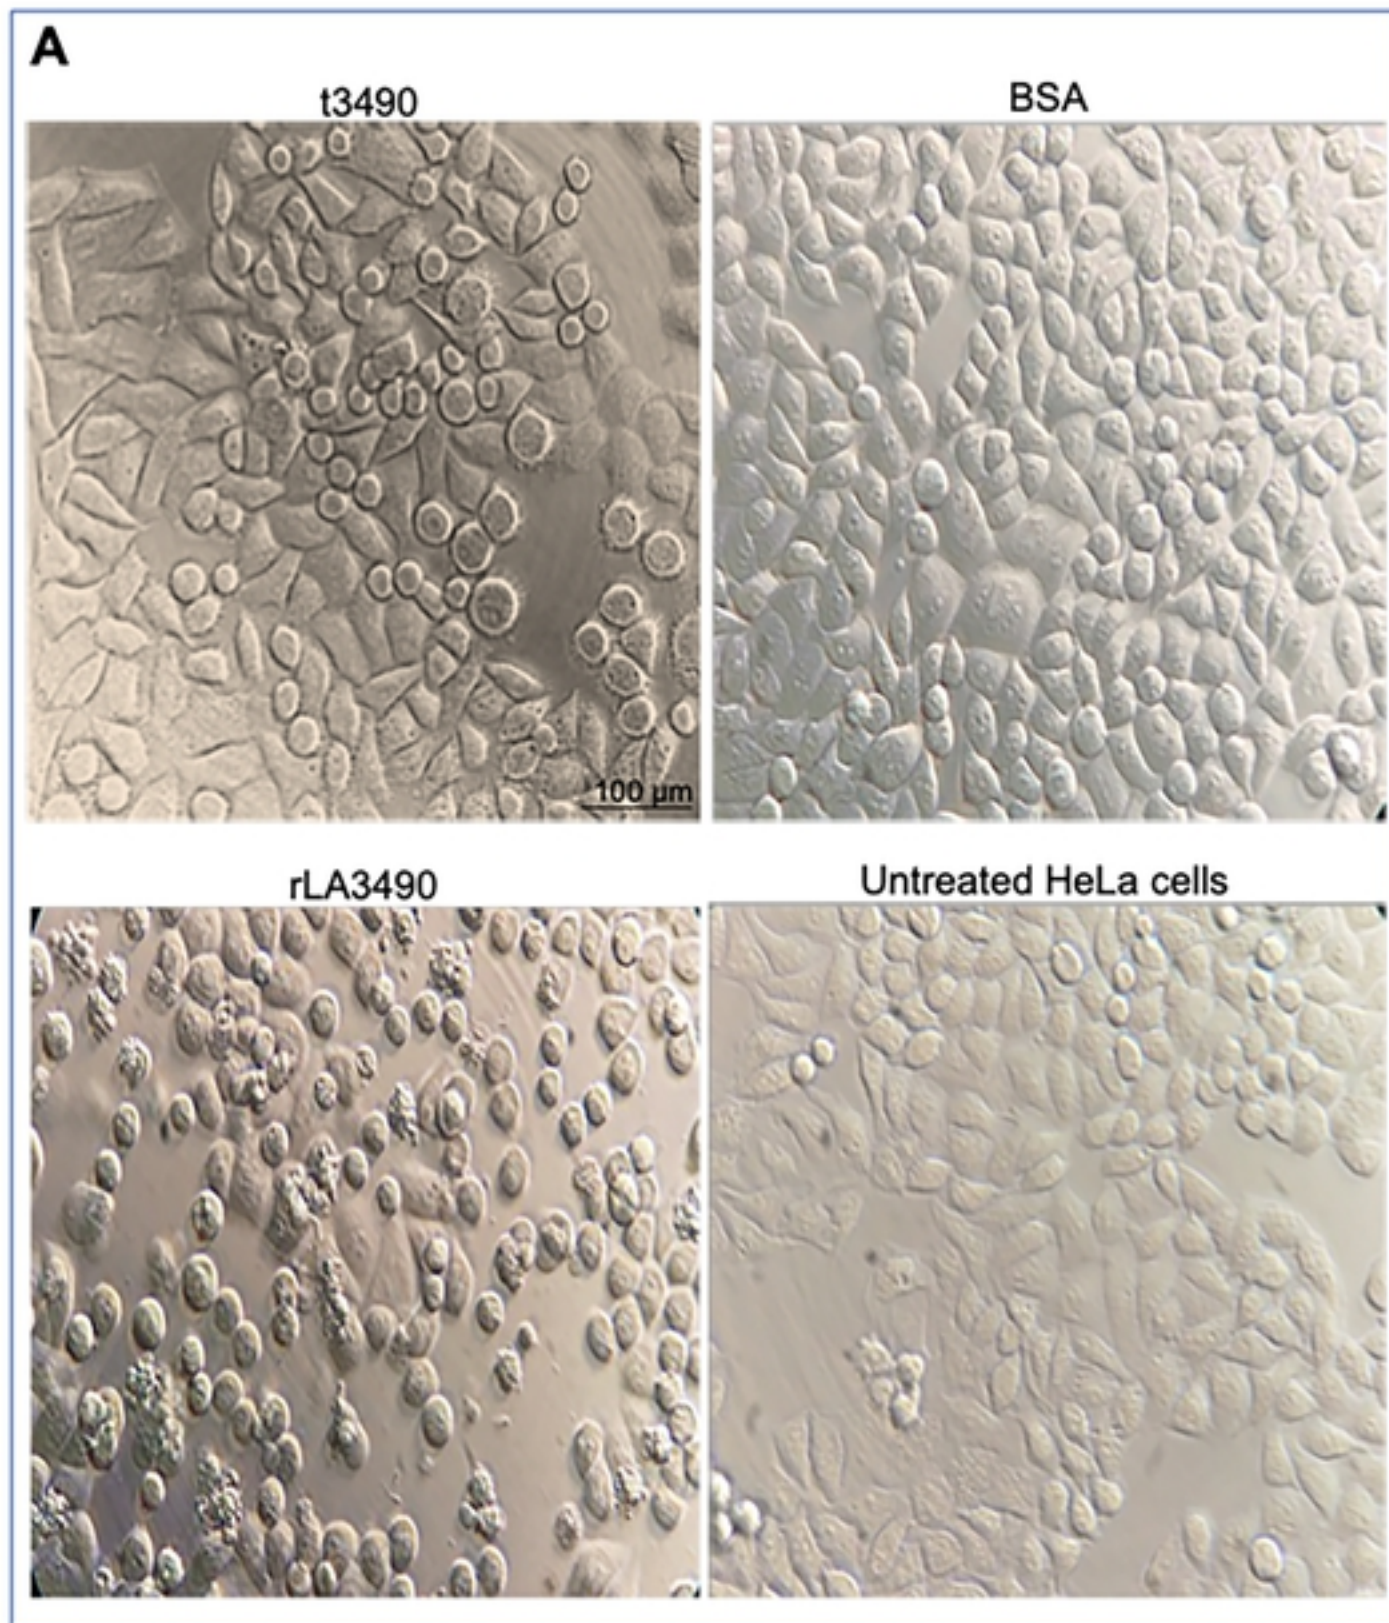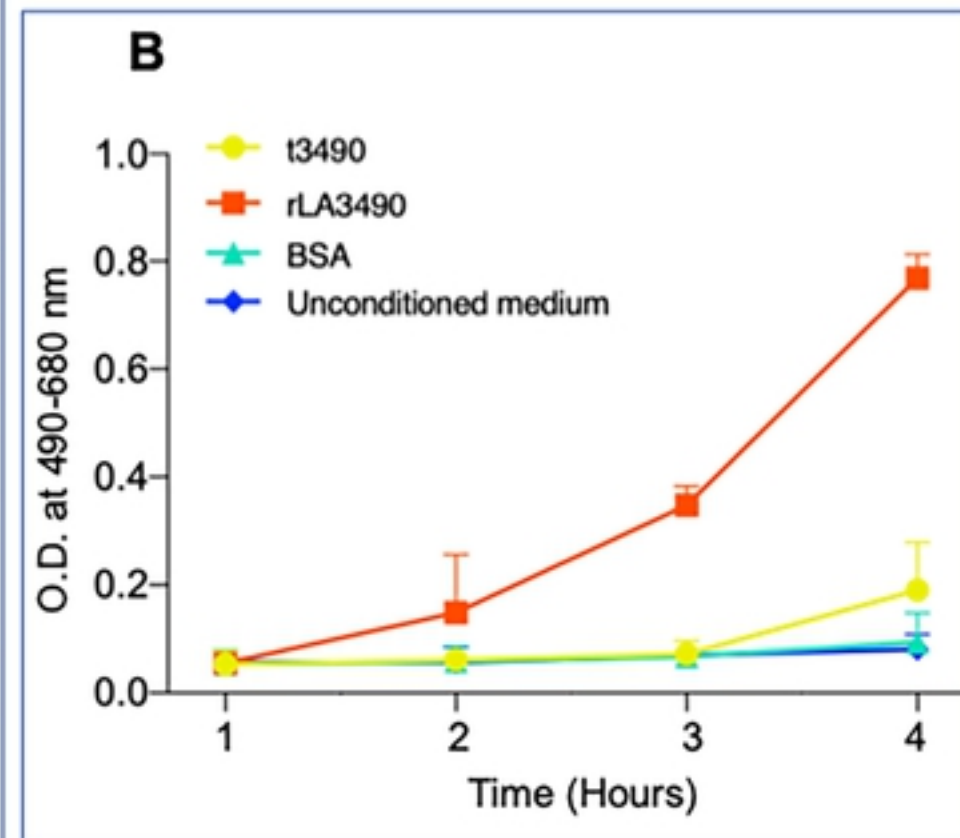

Figure 4

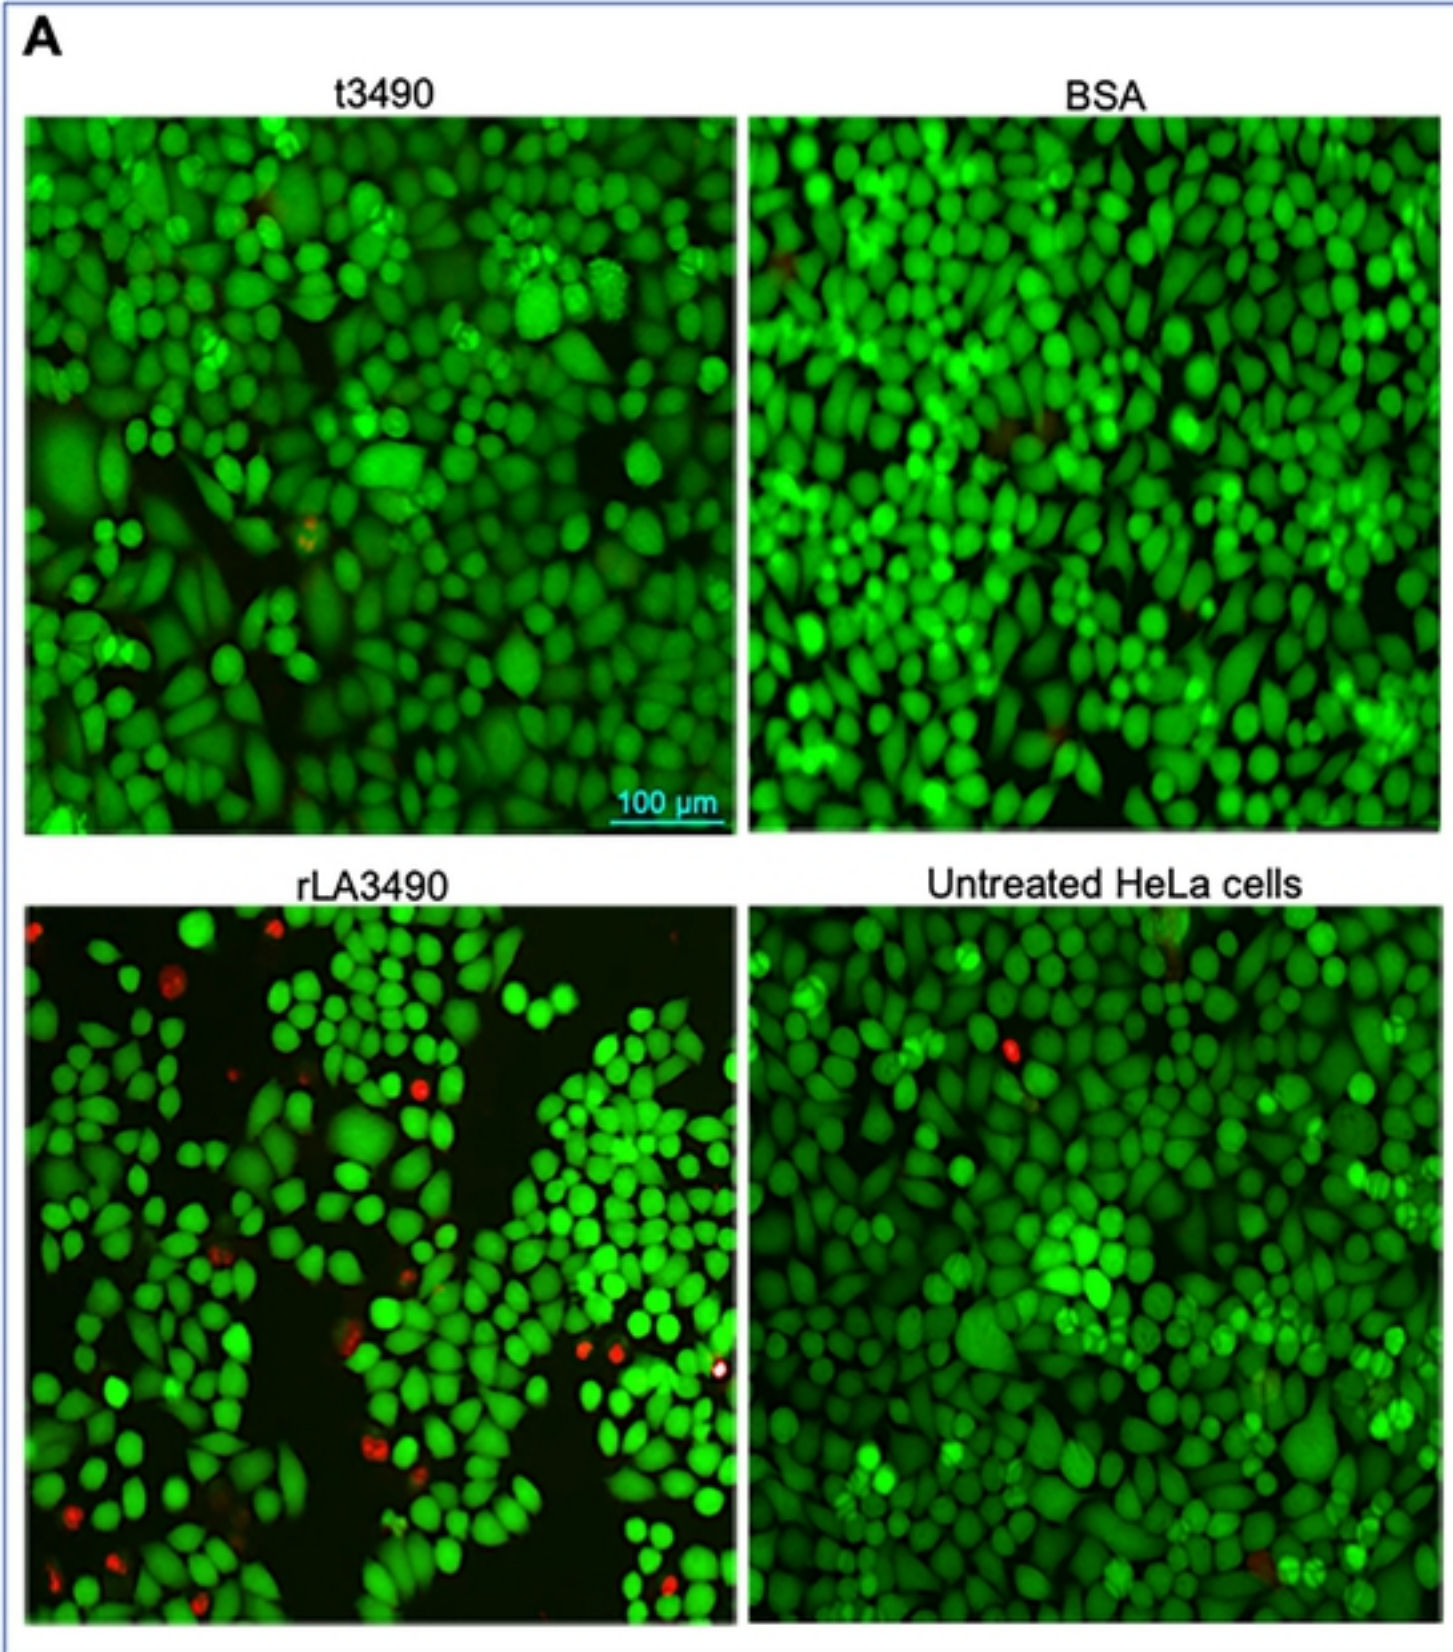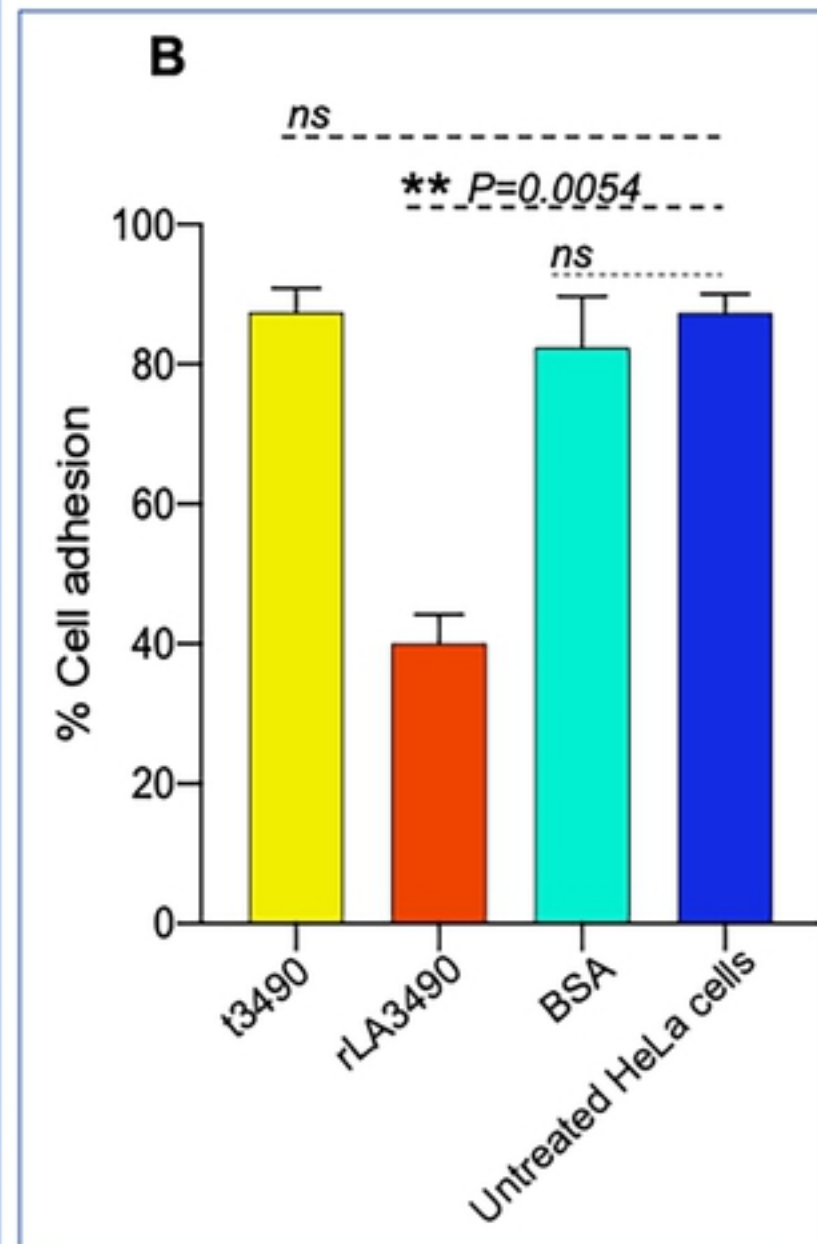

Figure 5



1 h

2 h

4 h

bioRxiv preprint doi: <https://doi.org/10.1101/2020.05.13.094169>; this version posted May 13, 2020. The copyright holder for this preprint (which was not certified by peer review) is the author/funder, who has granted bioRxiv a license to display the preprint in perpetuity. It is made available under aCC-BY 4.0 International license.

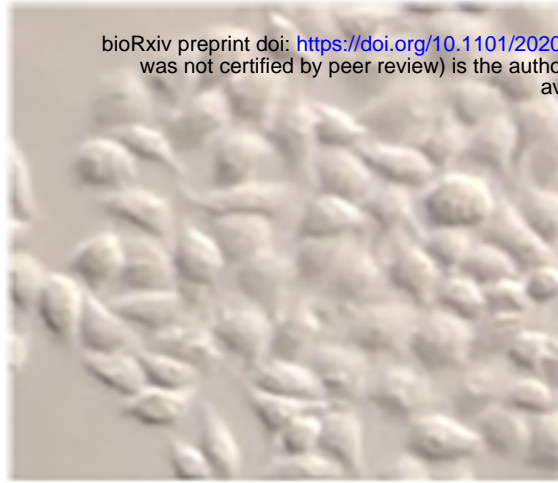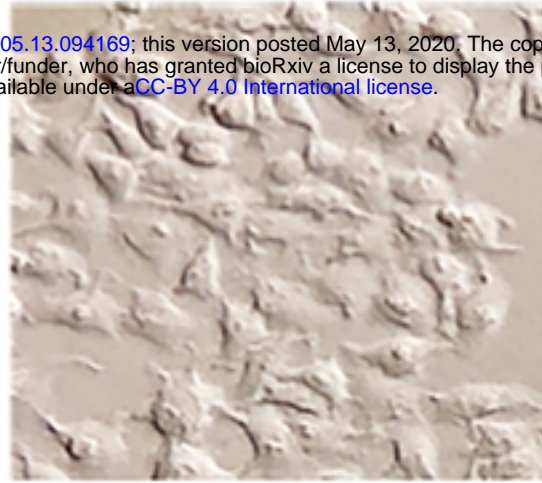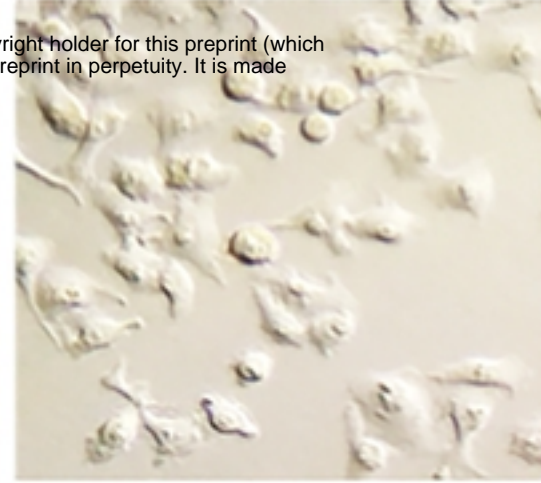

*L. interrogans* serovar Manilae  
Wild Type

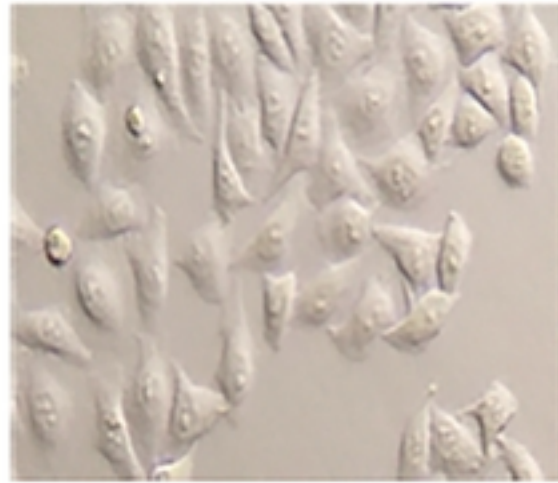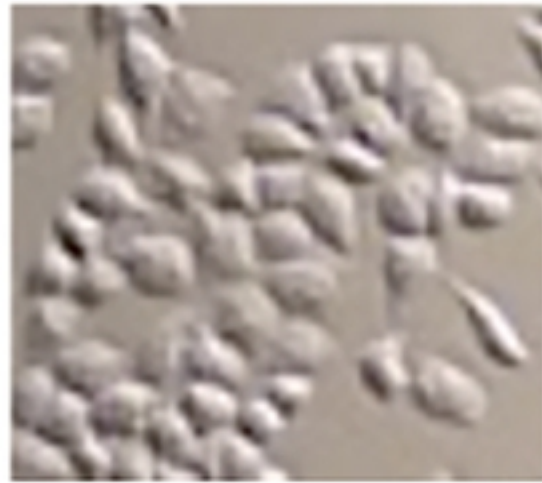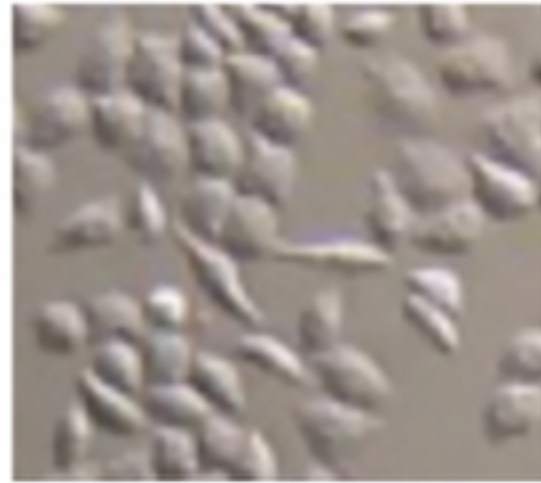

*L. licerasiae* serovar varillal  
No VM gene

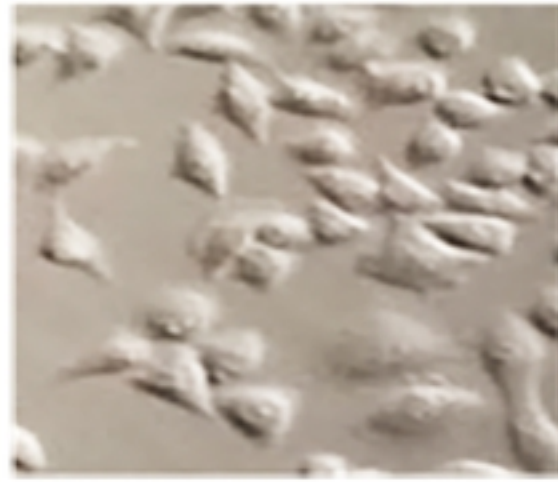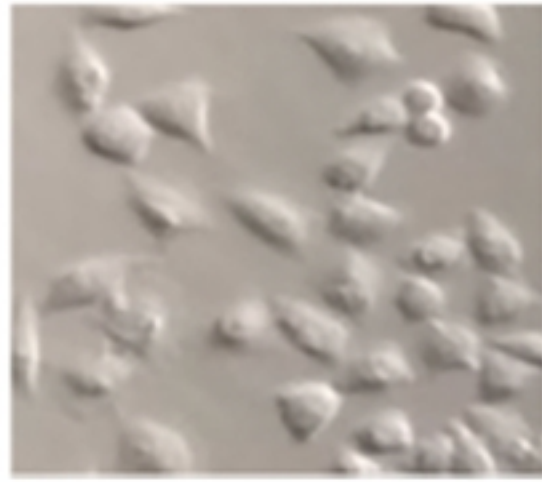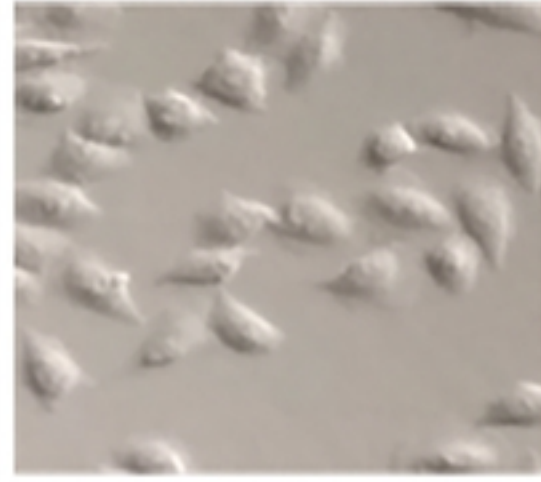

*L. interrogans* serovar Manilae  
Mutant ( $\Delta$ M1439)

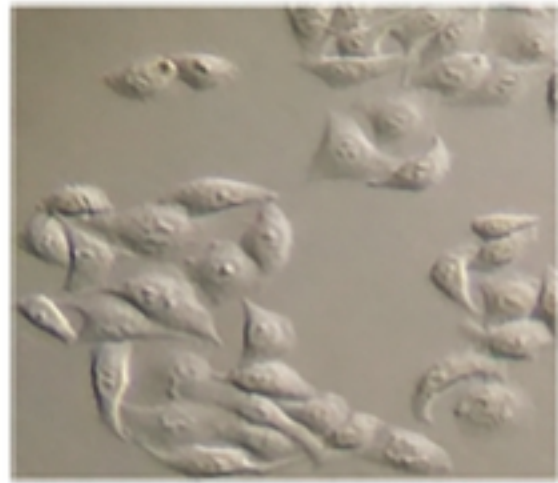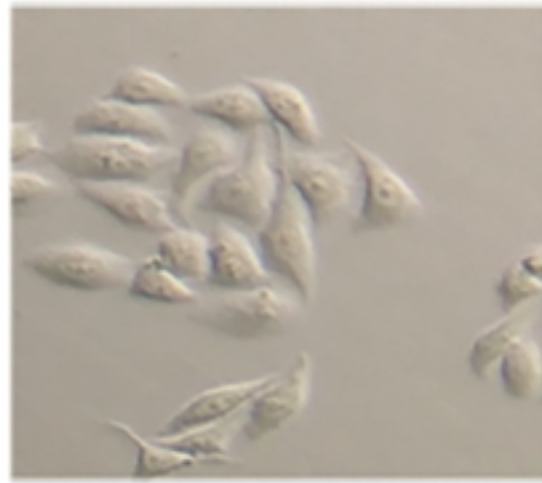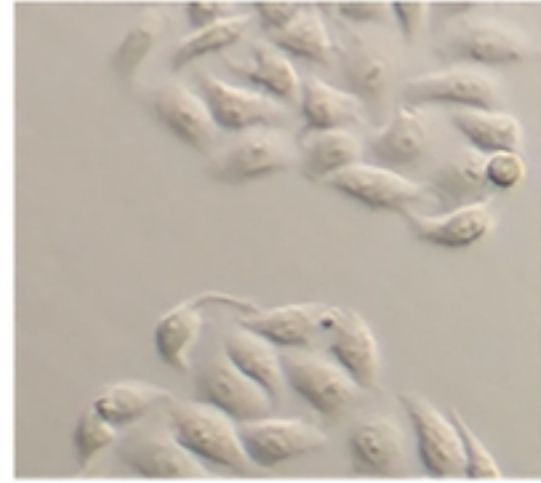

HeLa cells without  
*Leptospira* infection

Figure 6

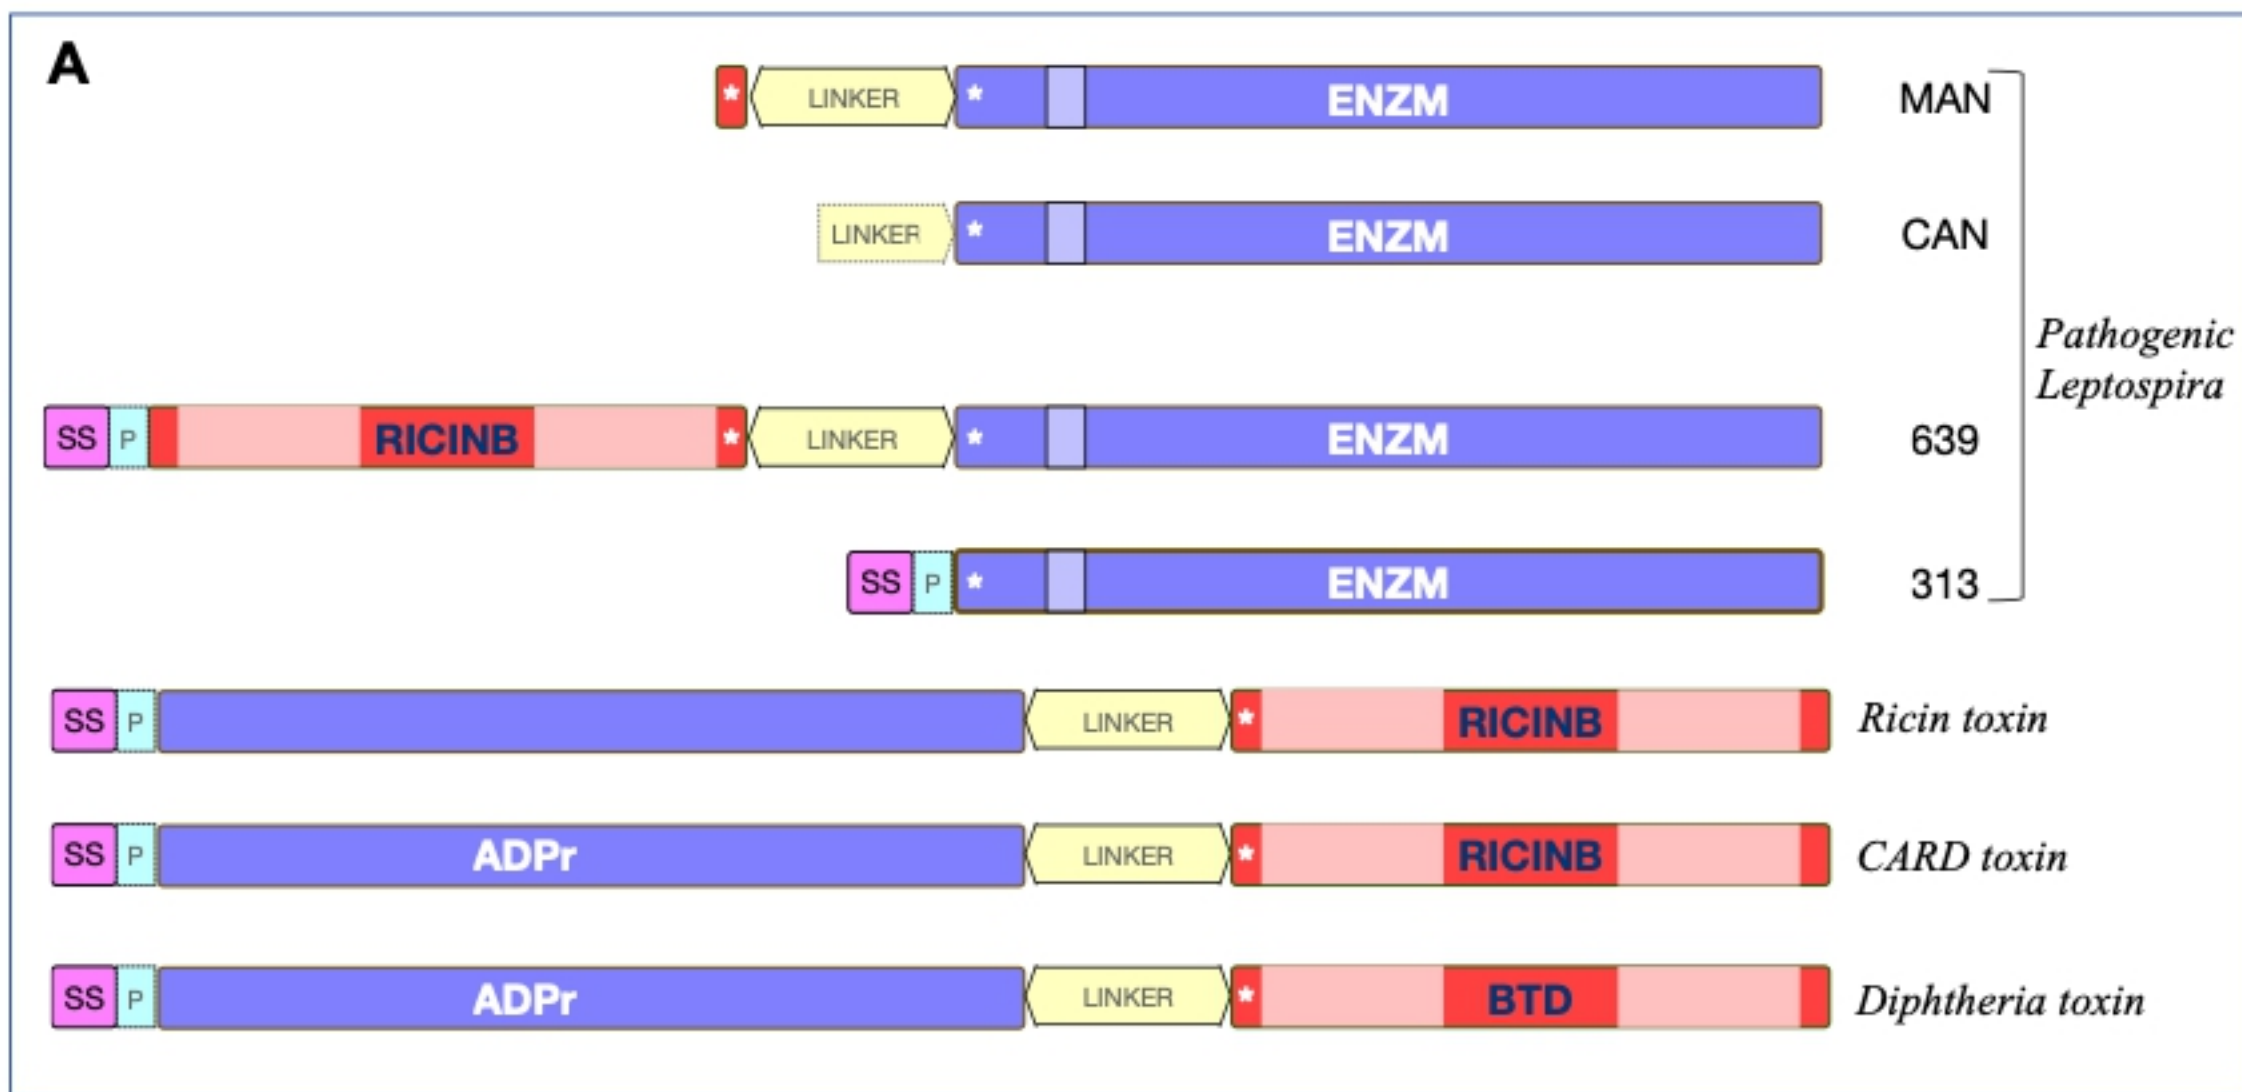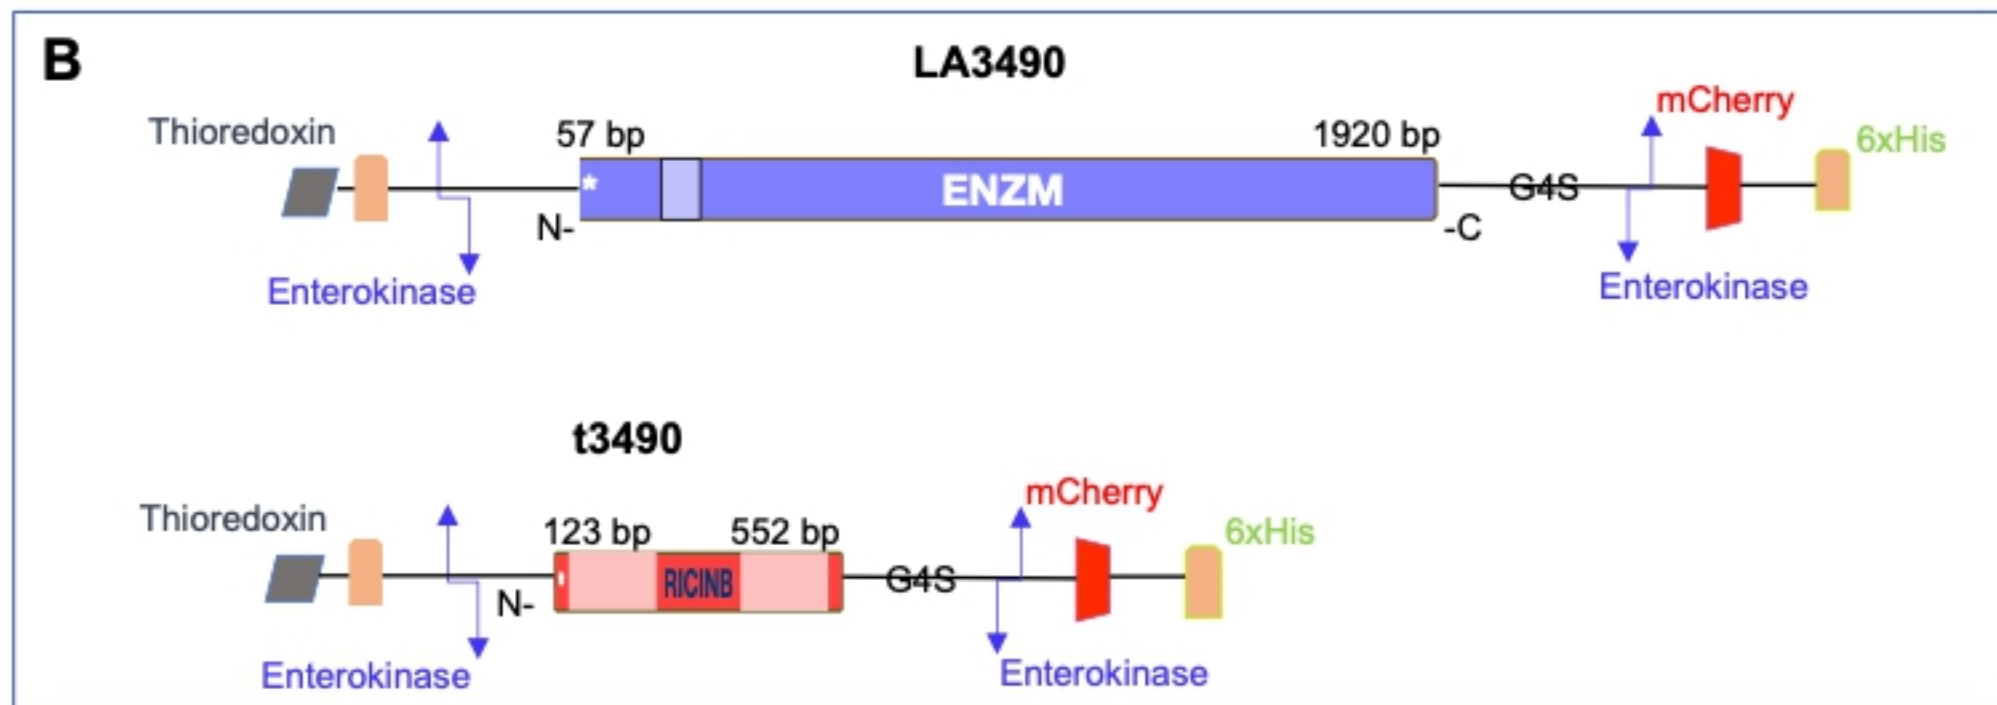

Figure 1

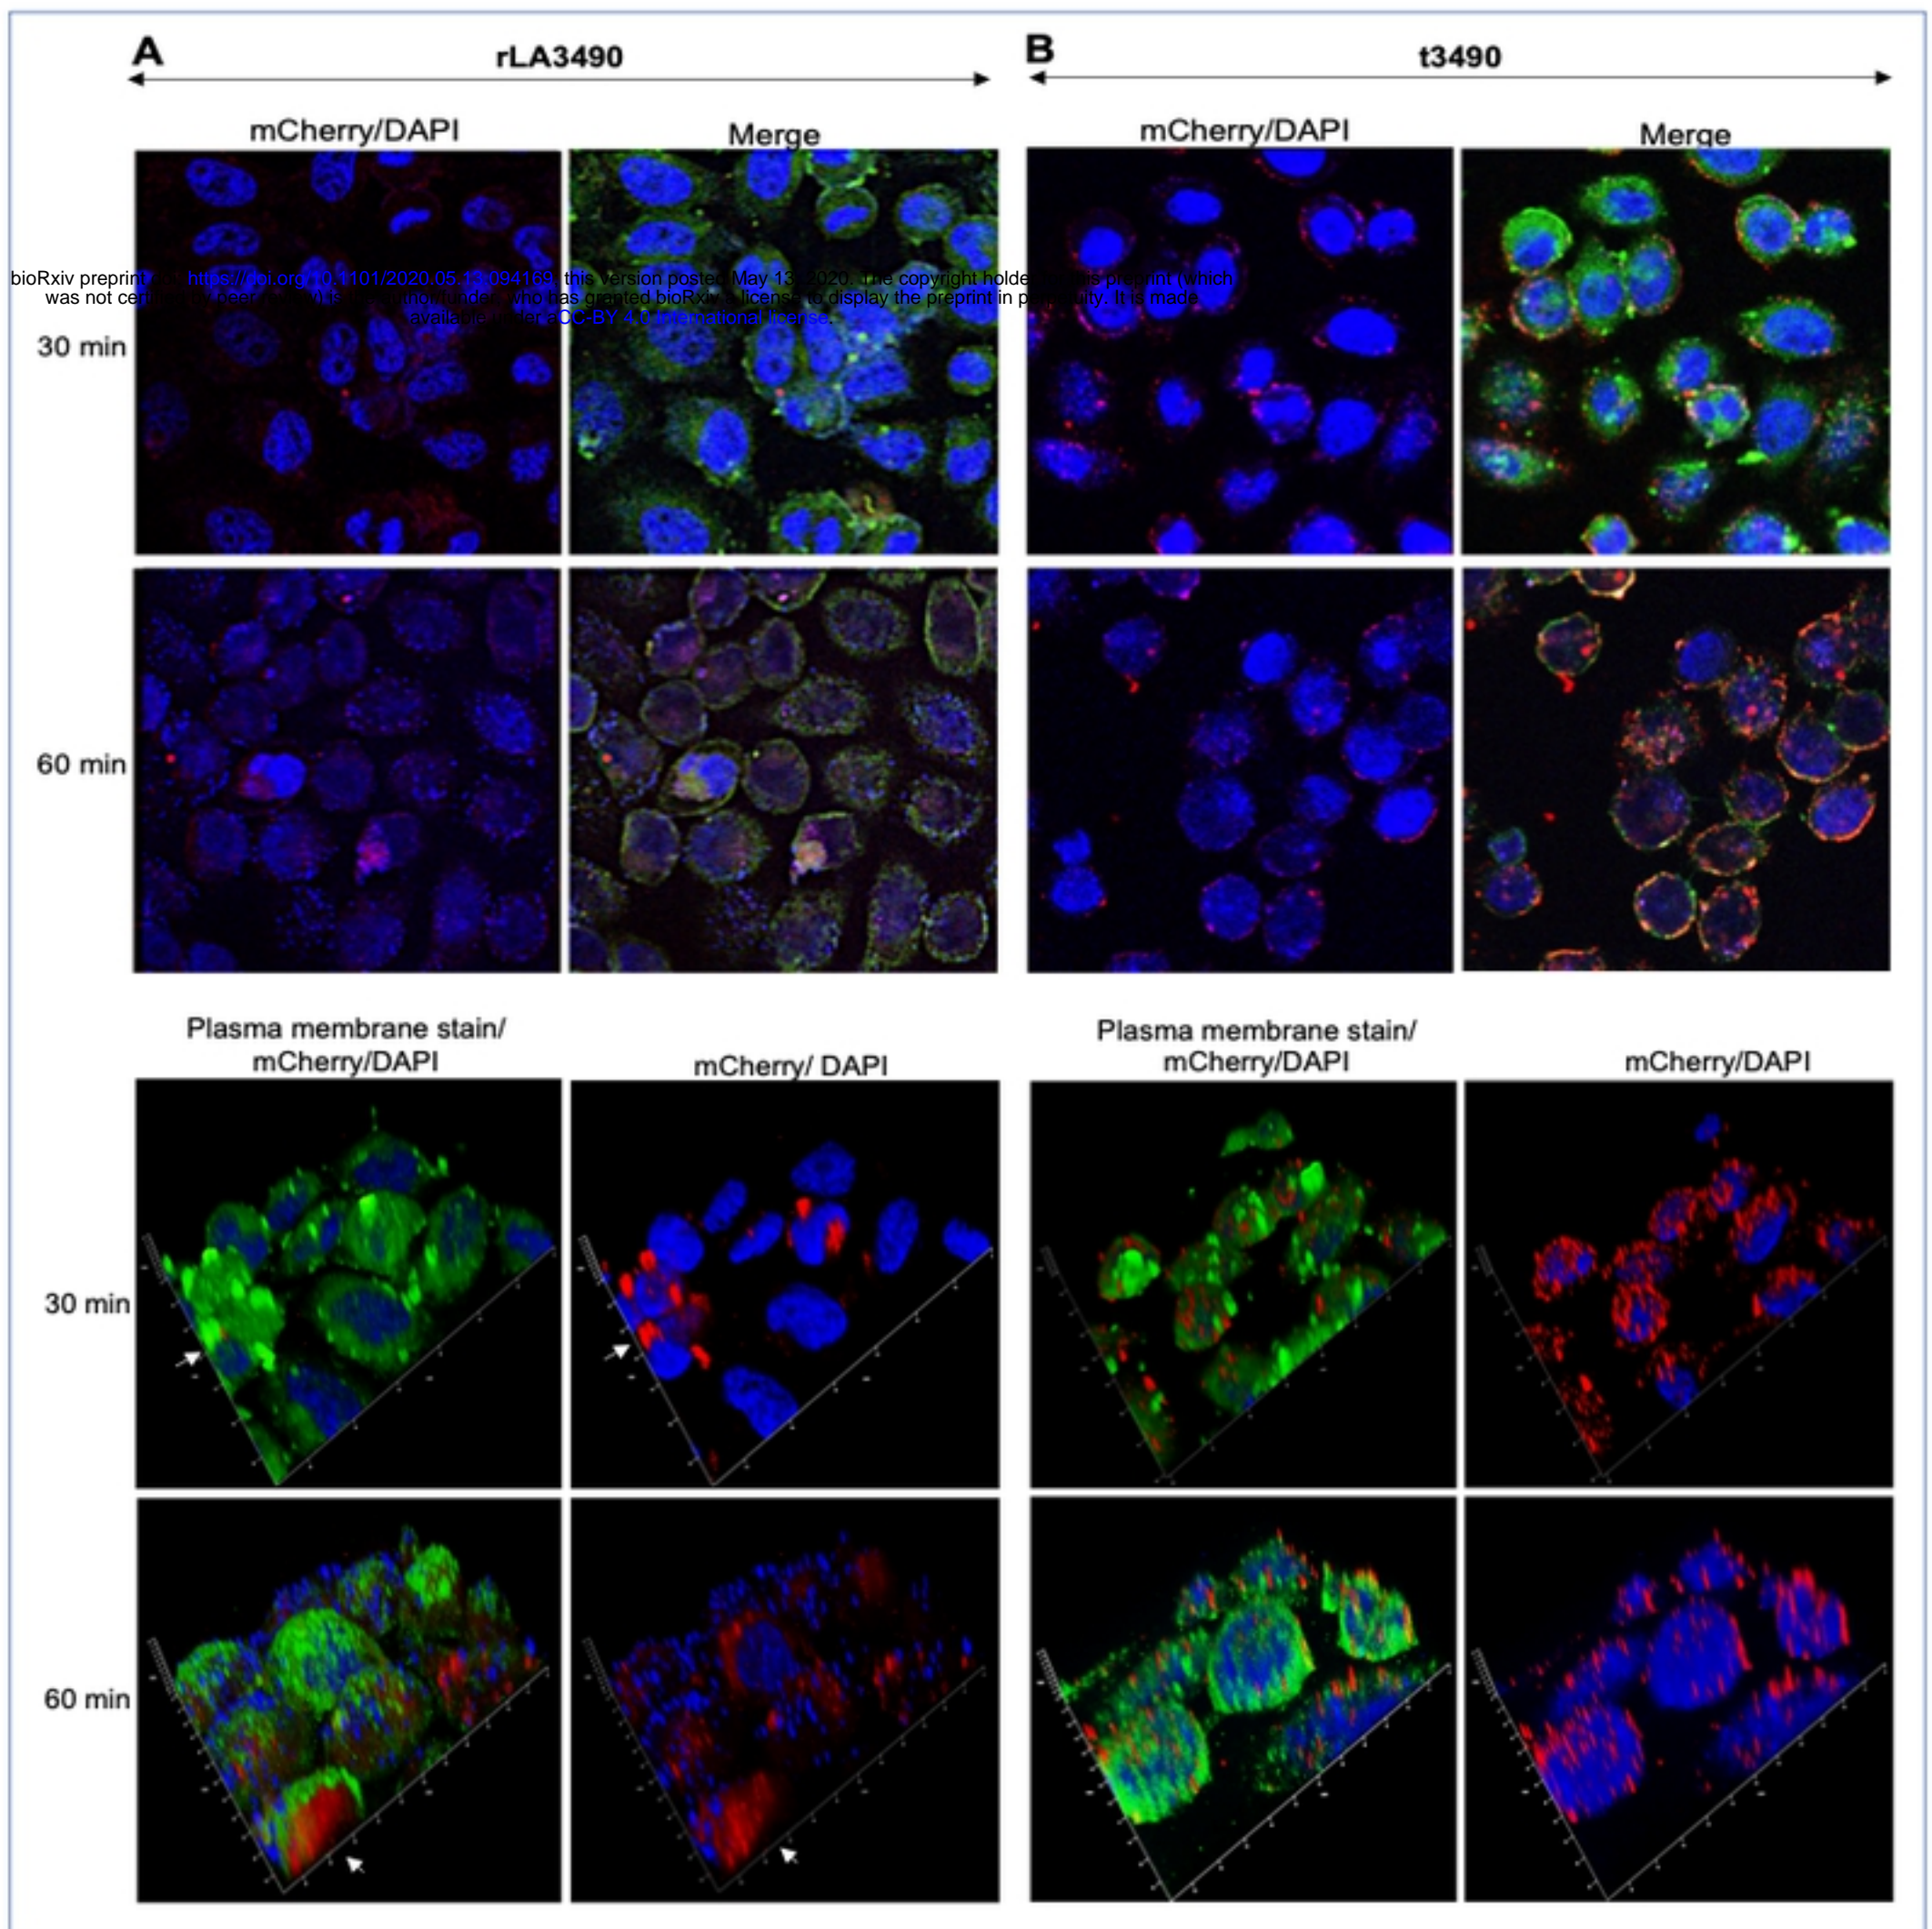

Figure 7

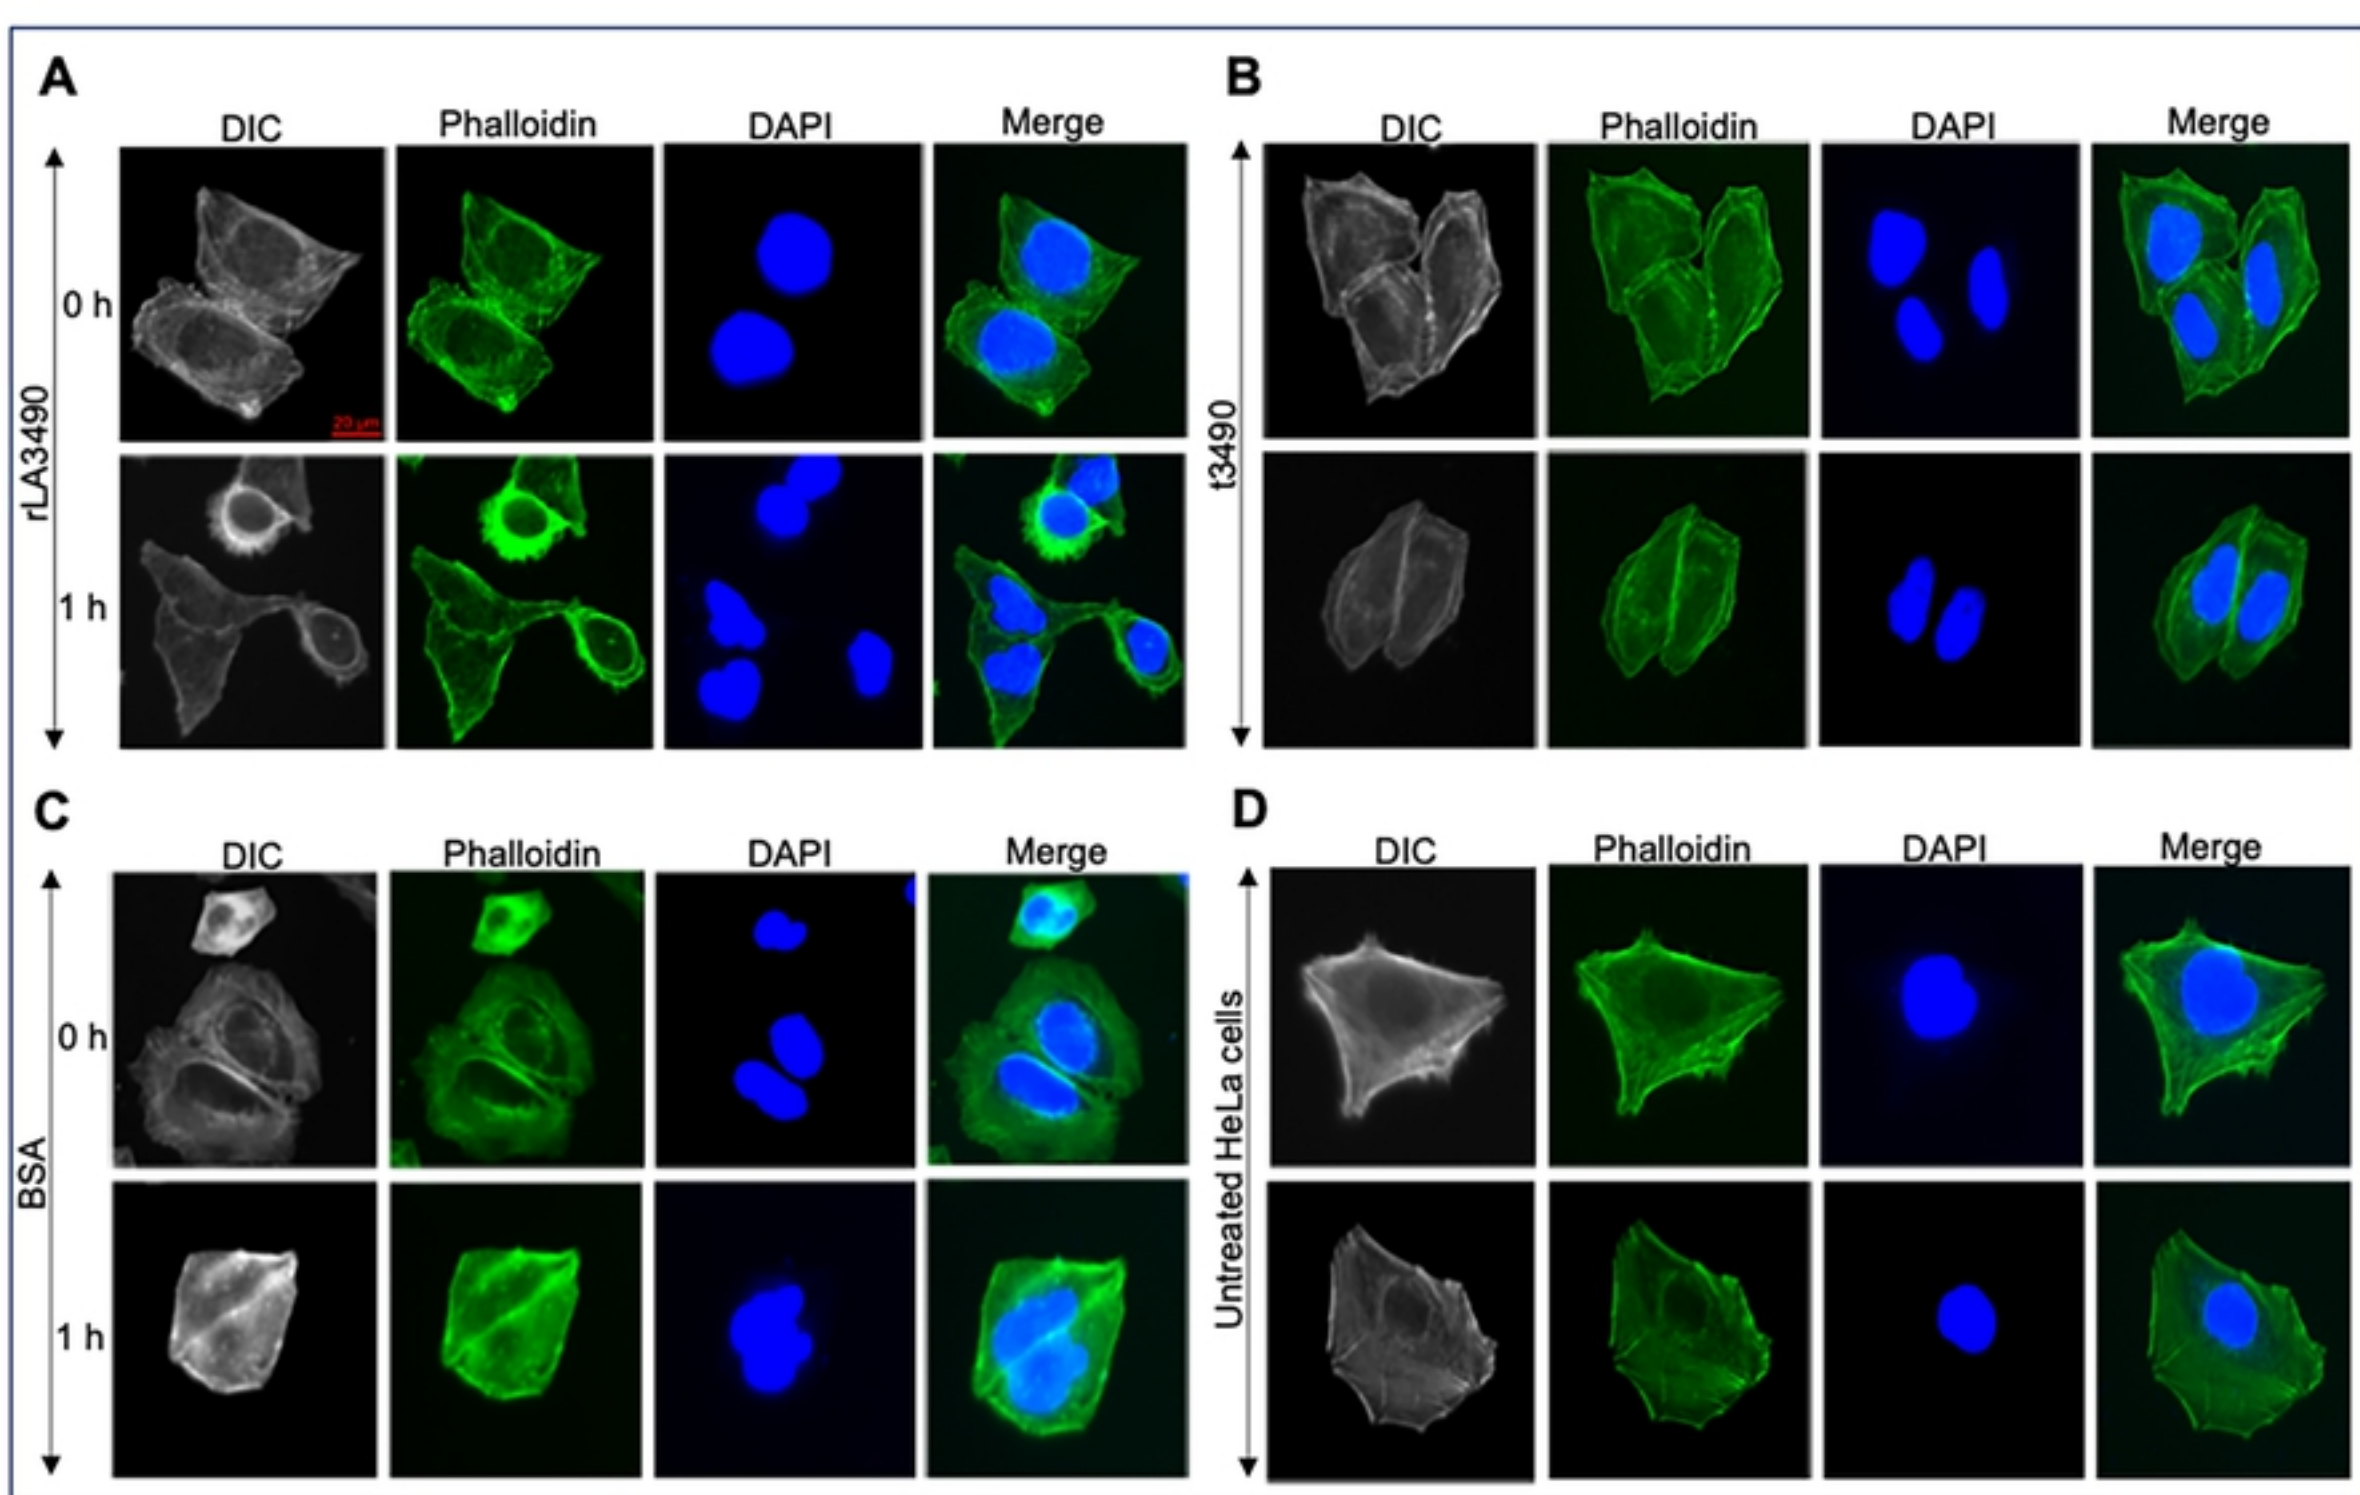

Figure 8
